# Supplementary material for: Metabolome analysis of 20 taxonomically related benzylisoquinoline alkaloid-producing plants
Source: PubMed Central journal article supplement (PMC4570626; doi:10.1186/s12870-015-0594-2), 2015-09-15
Supplement: 12870_2015_594_MOESM8_ESM.pdf [file 12870_2015_594_MOESM8_ESM.pdf]

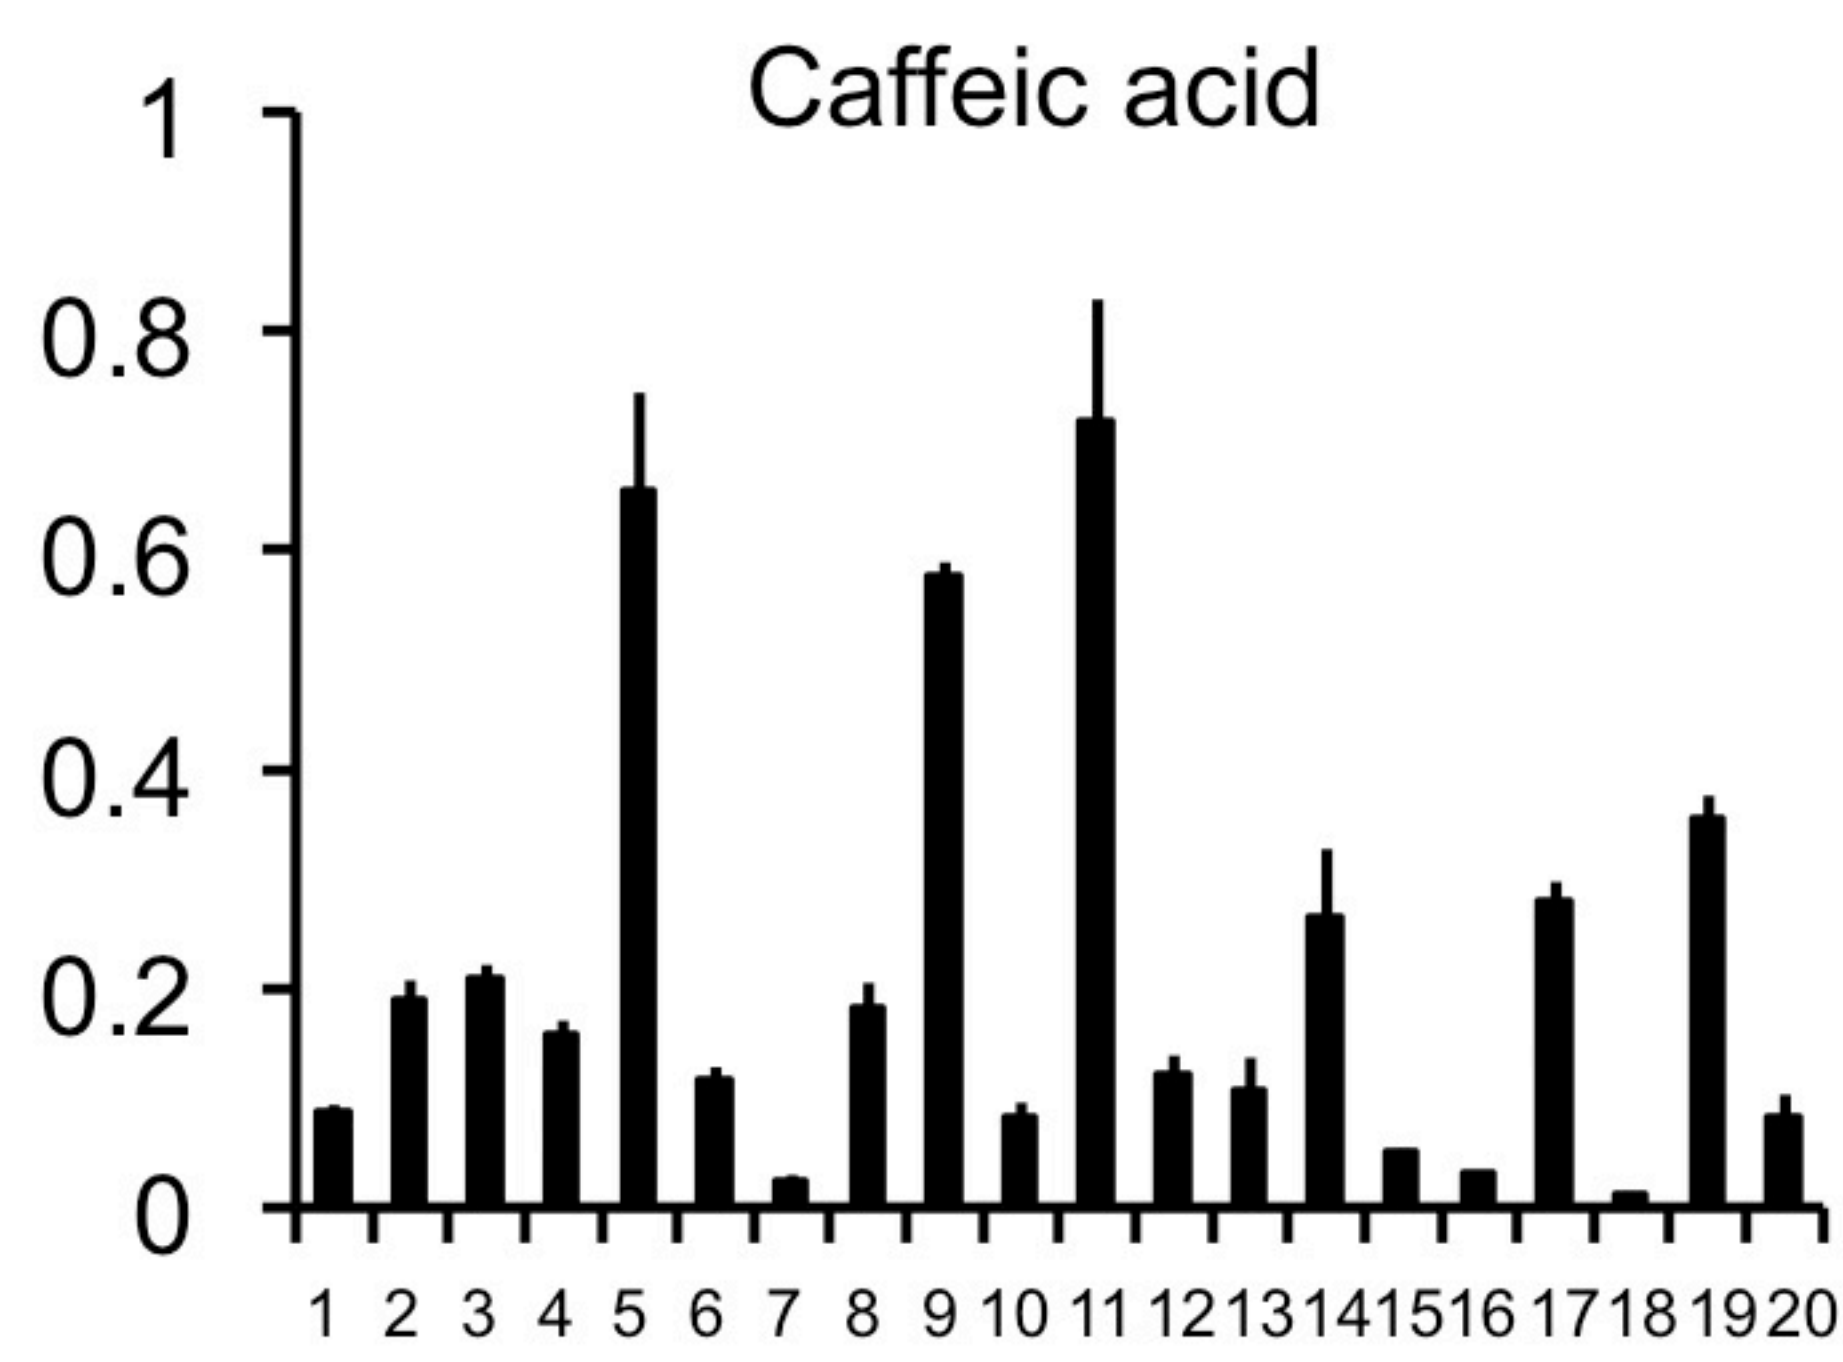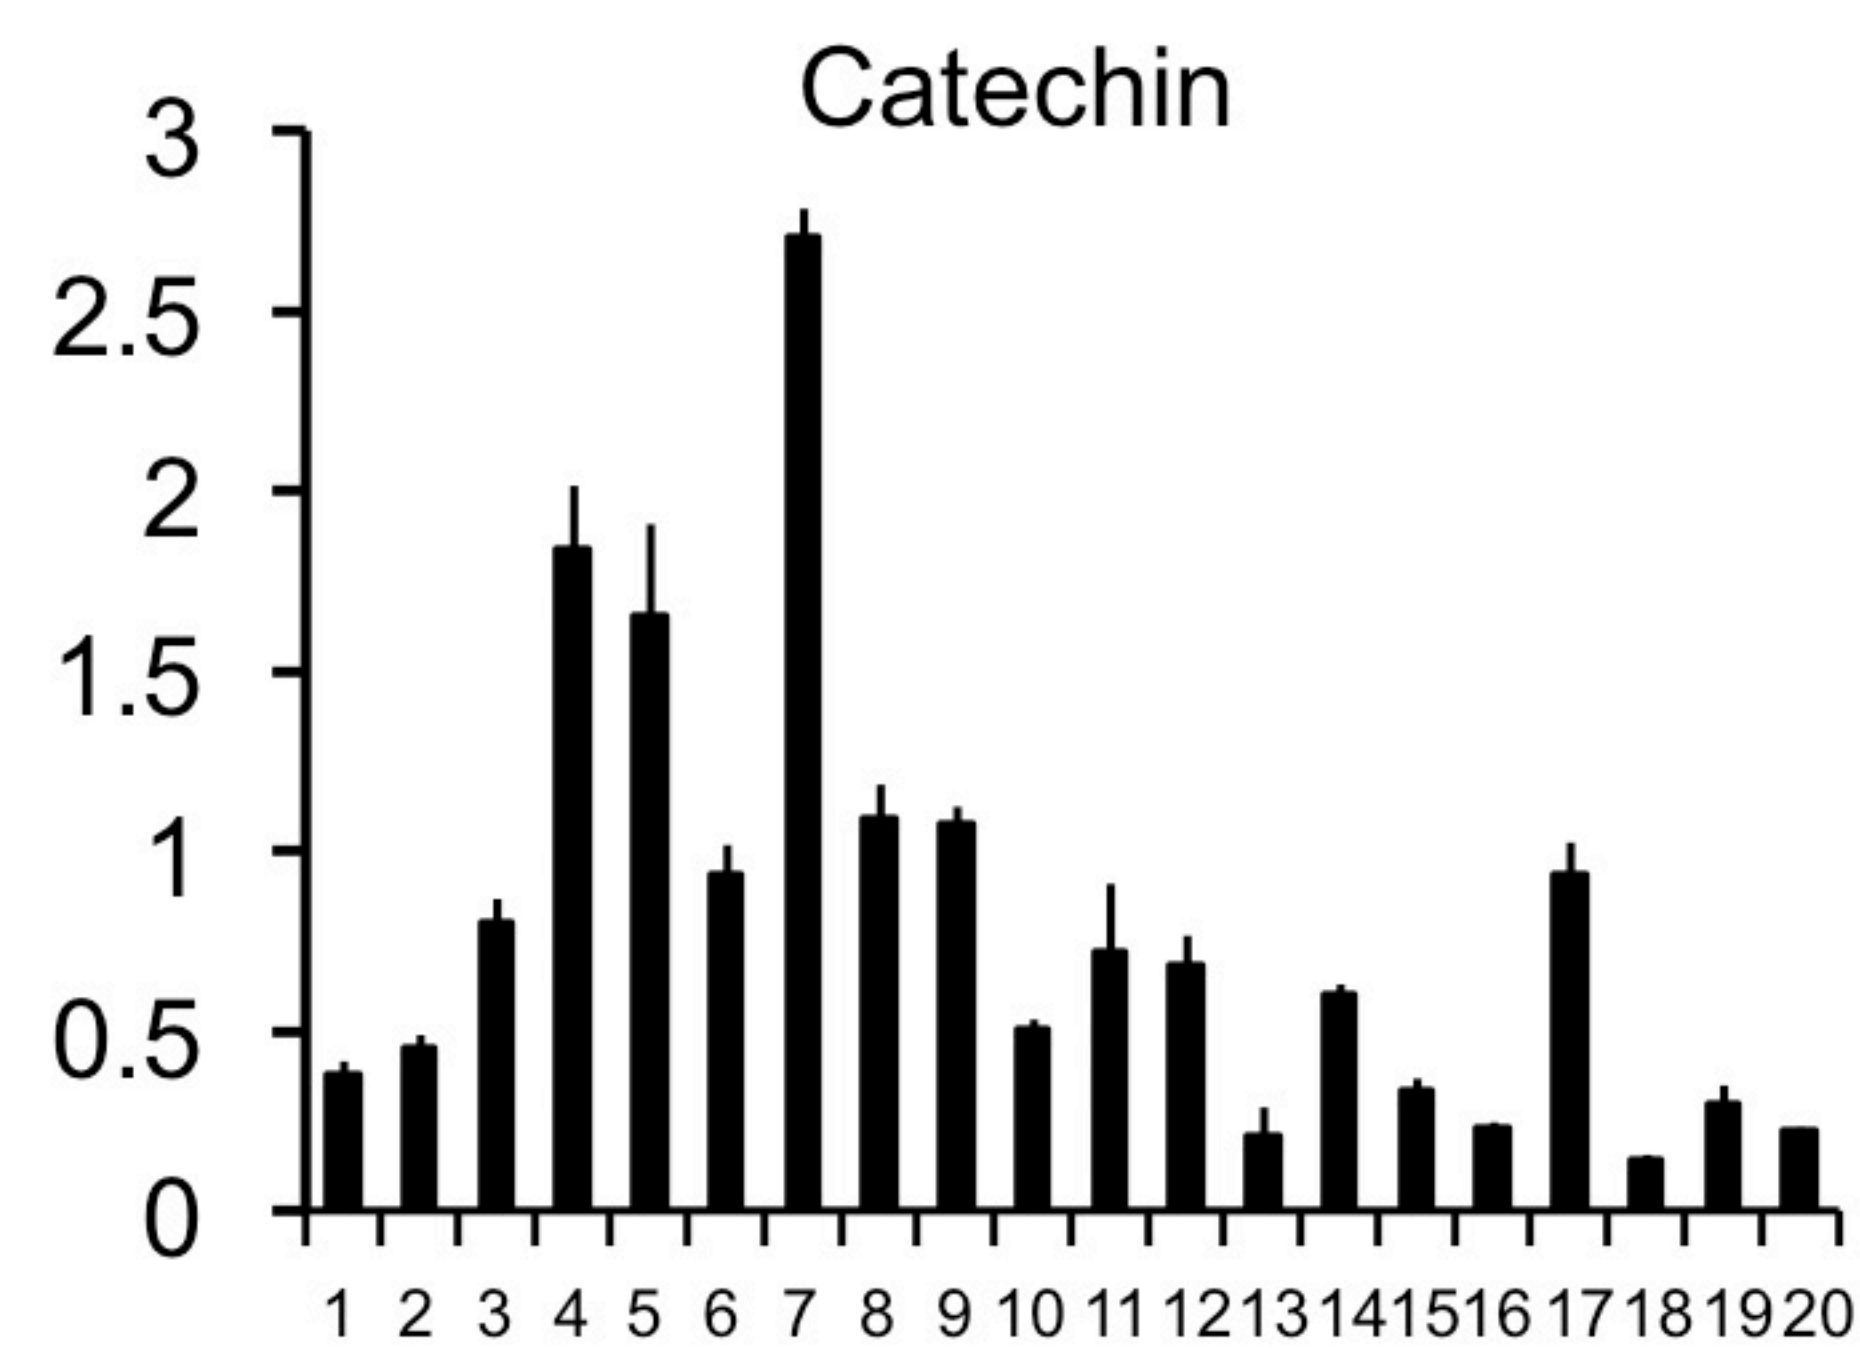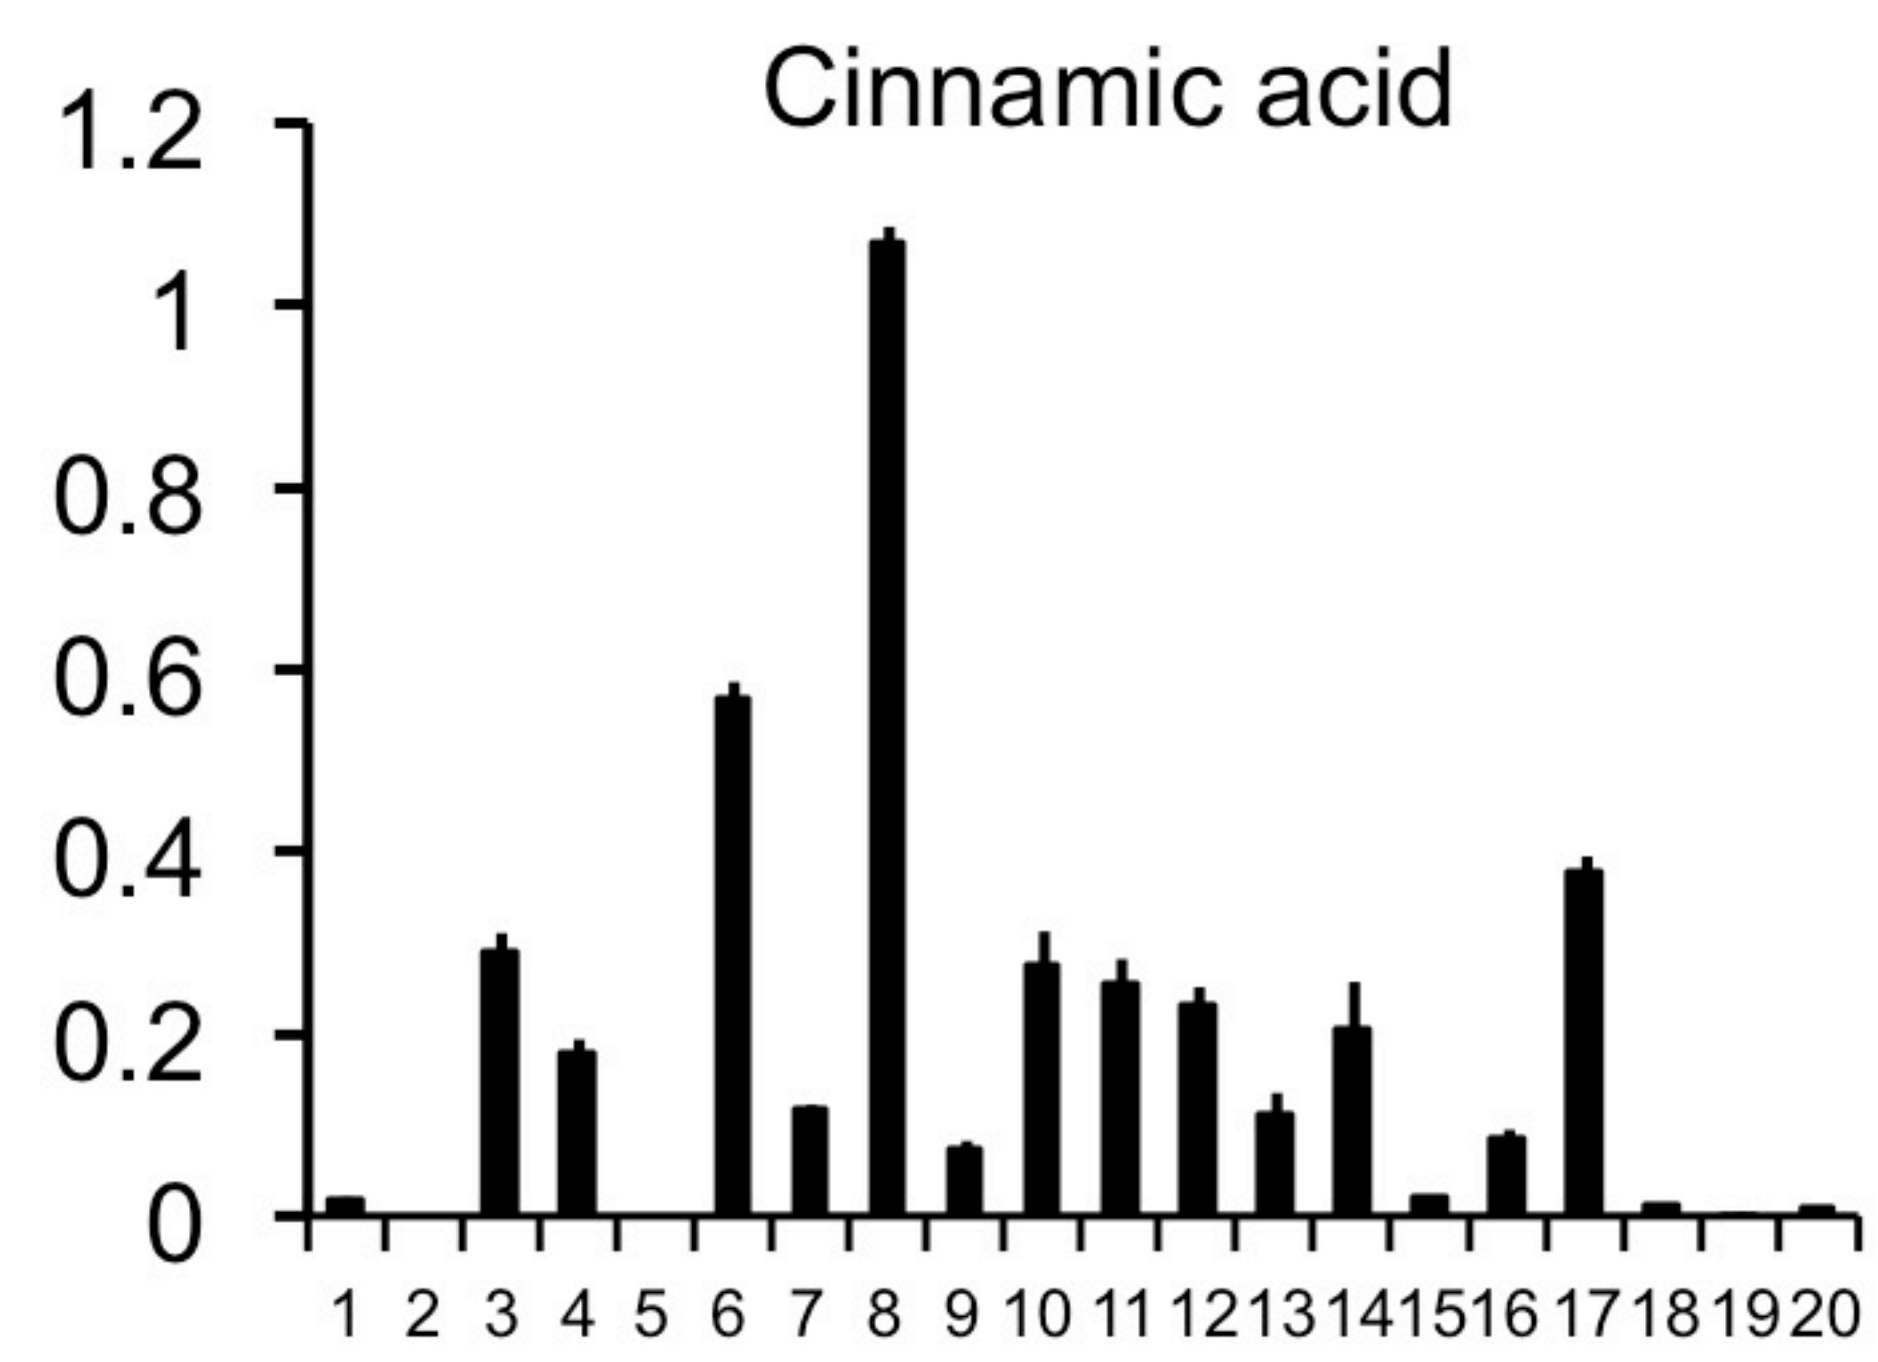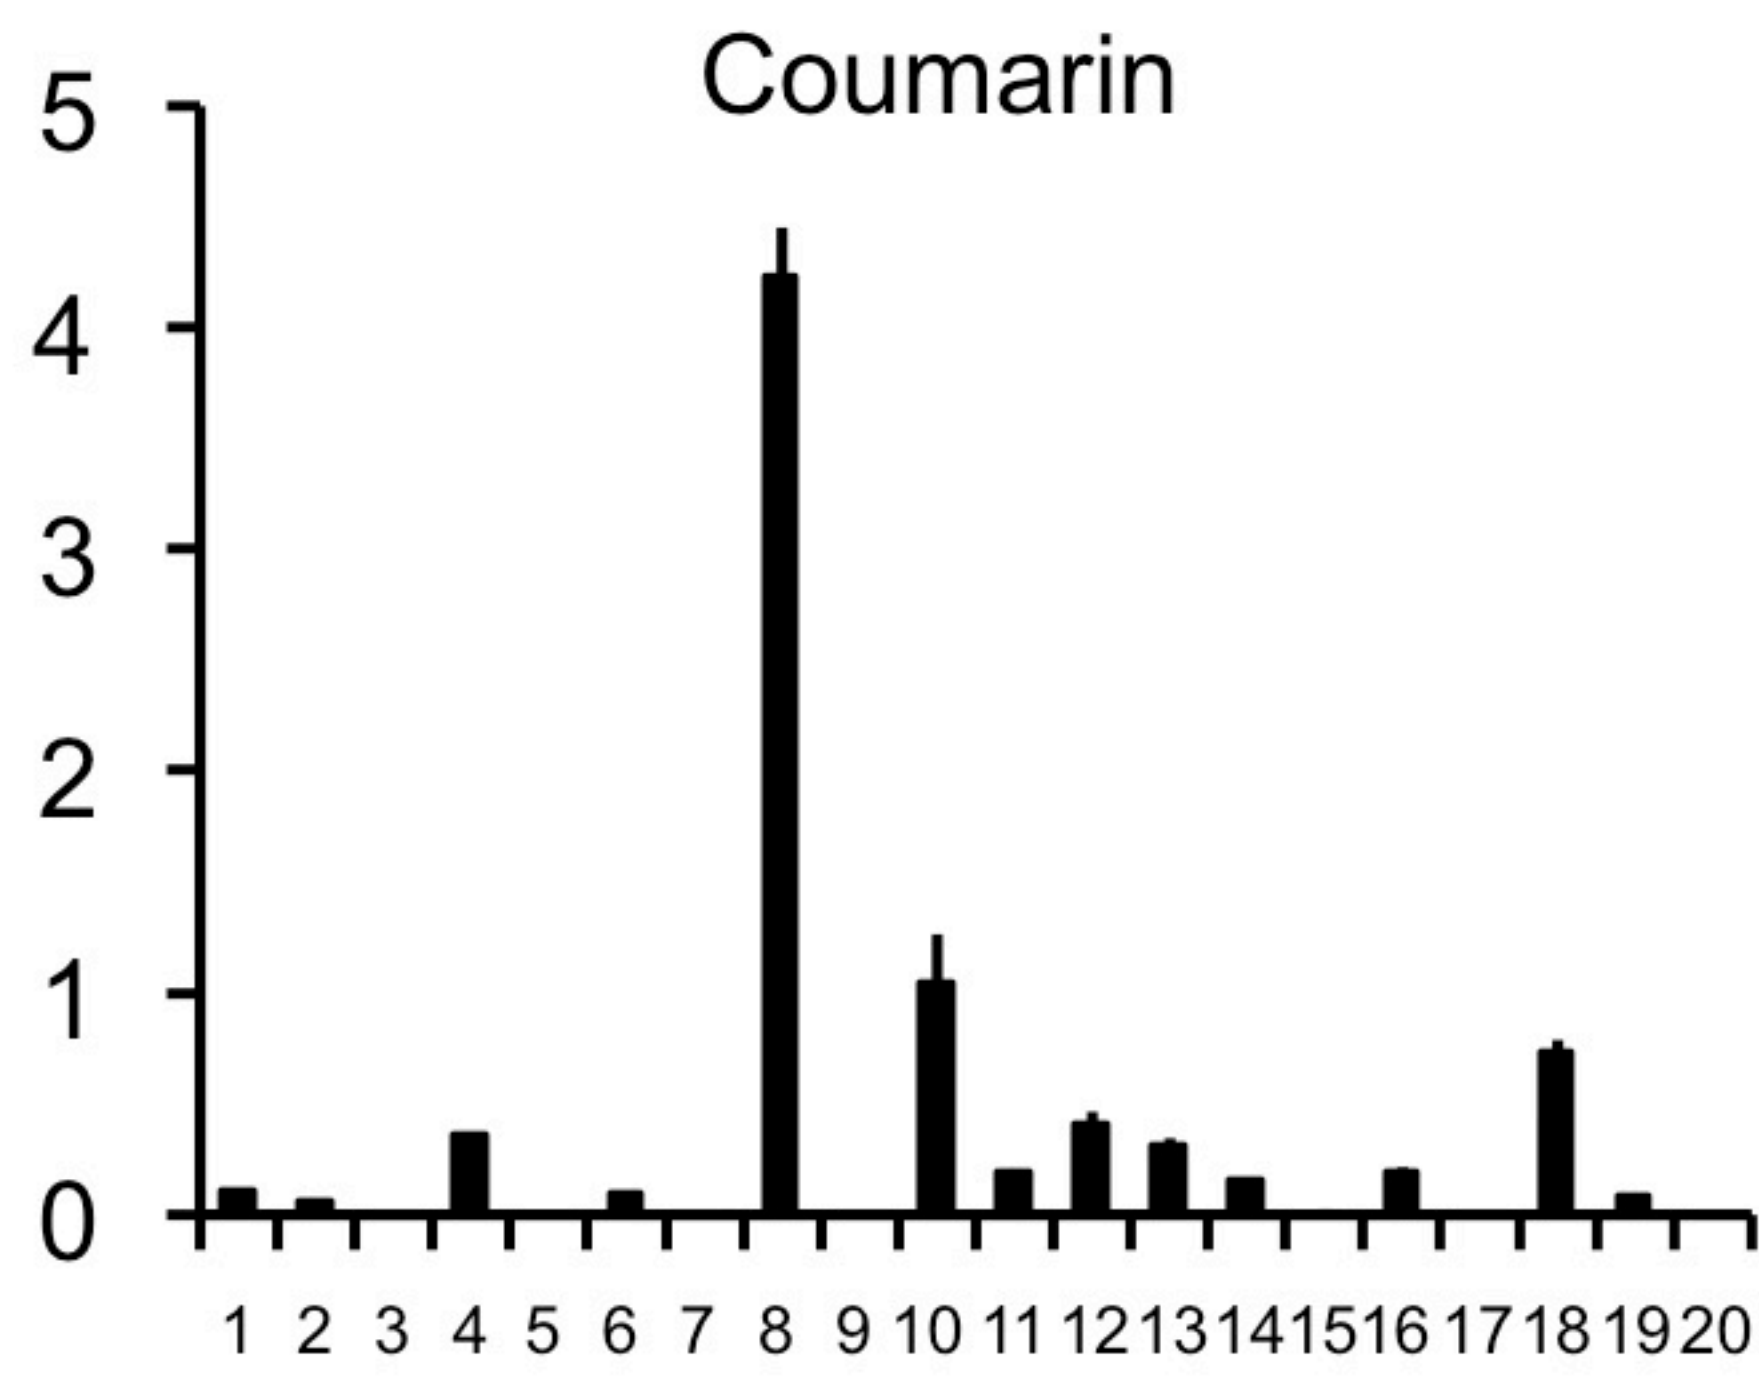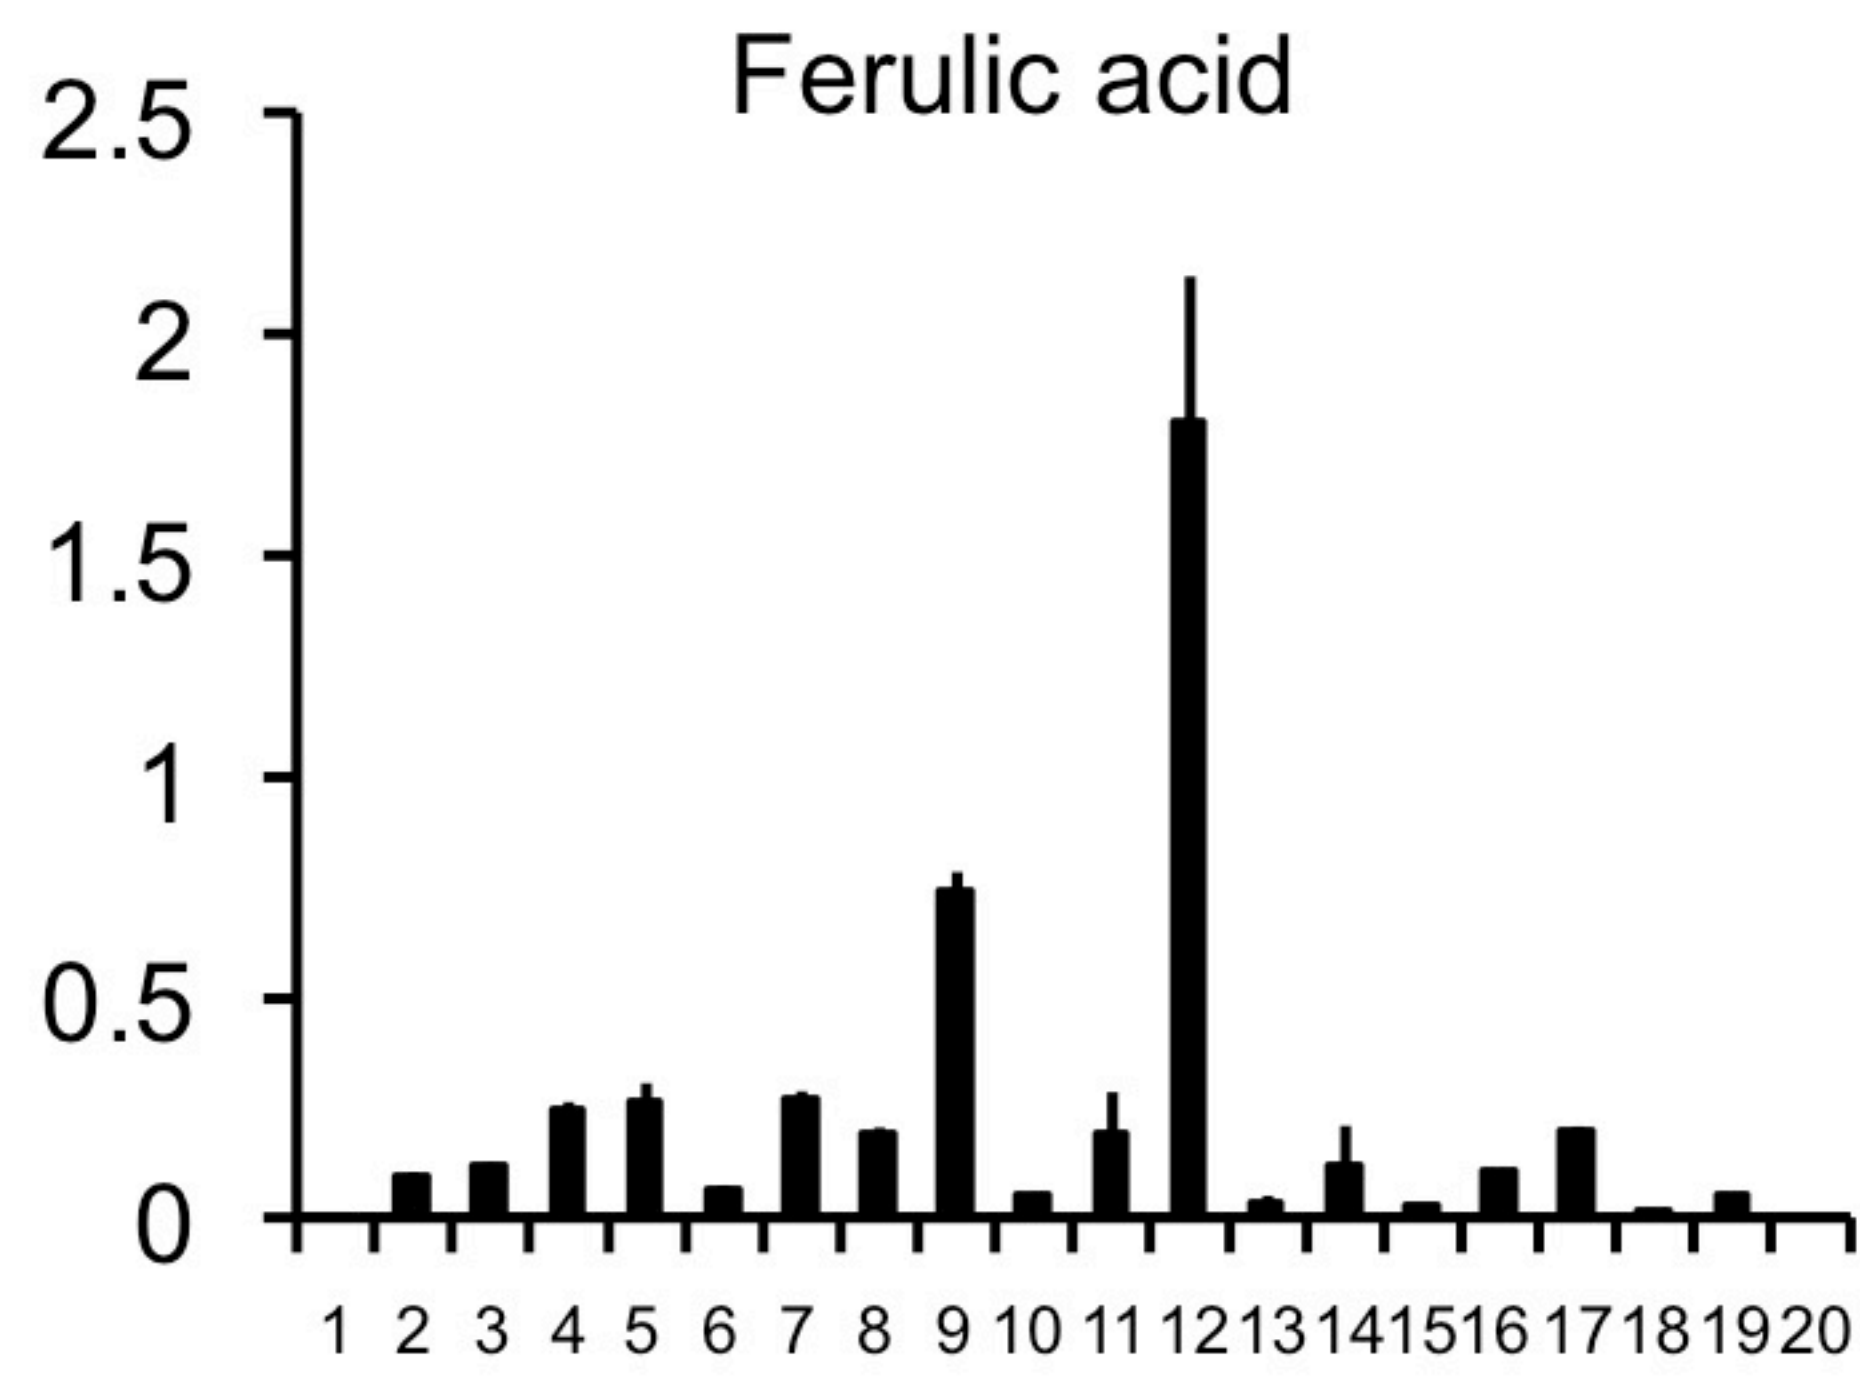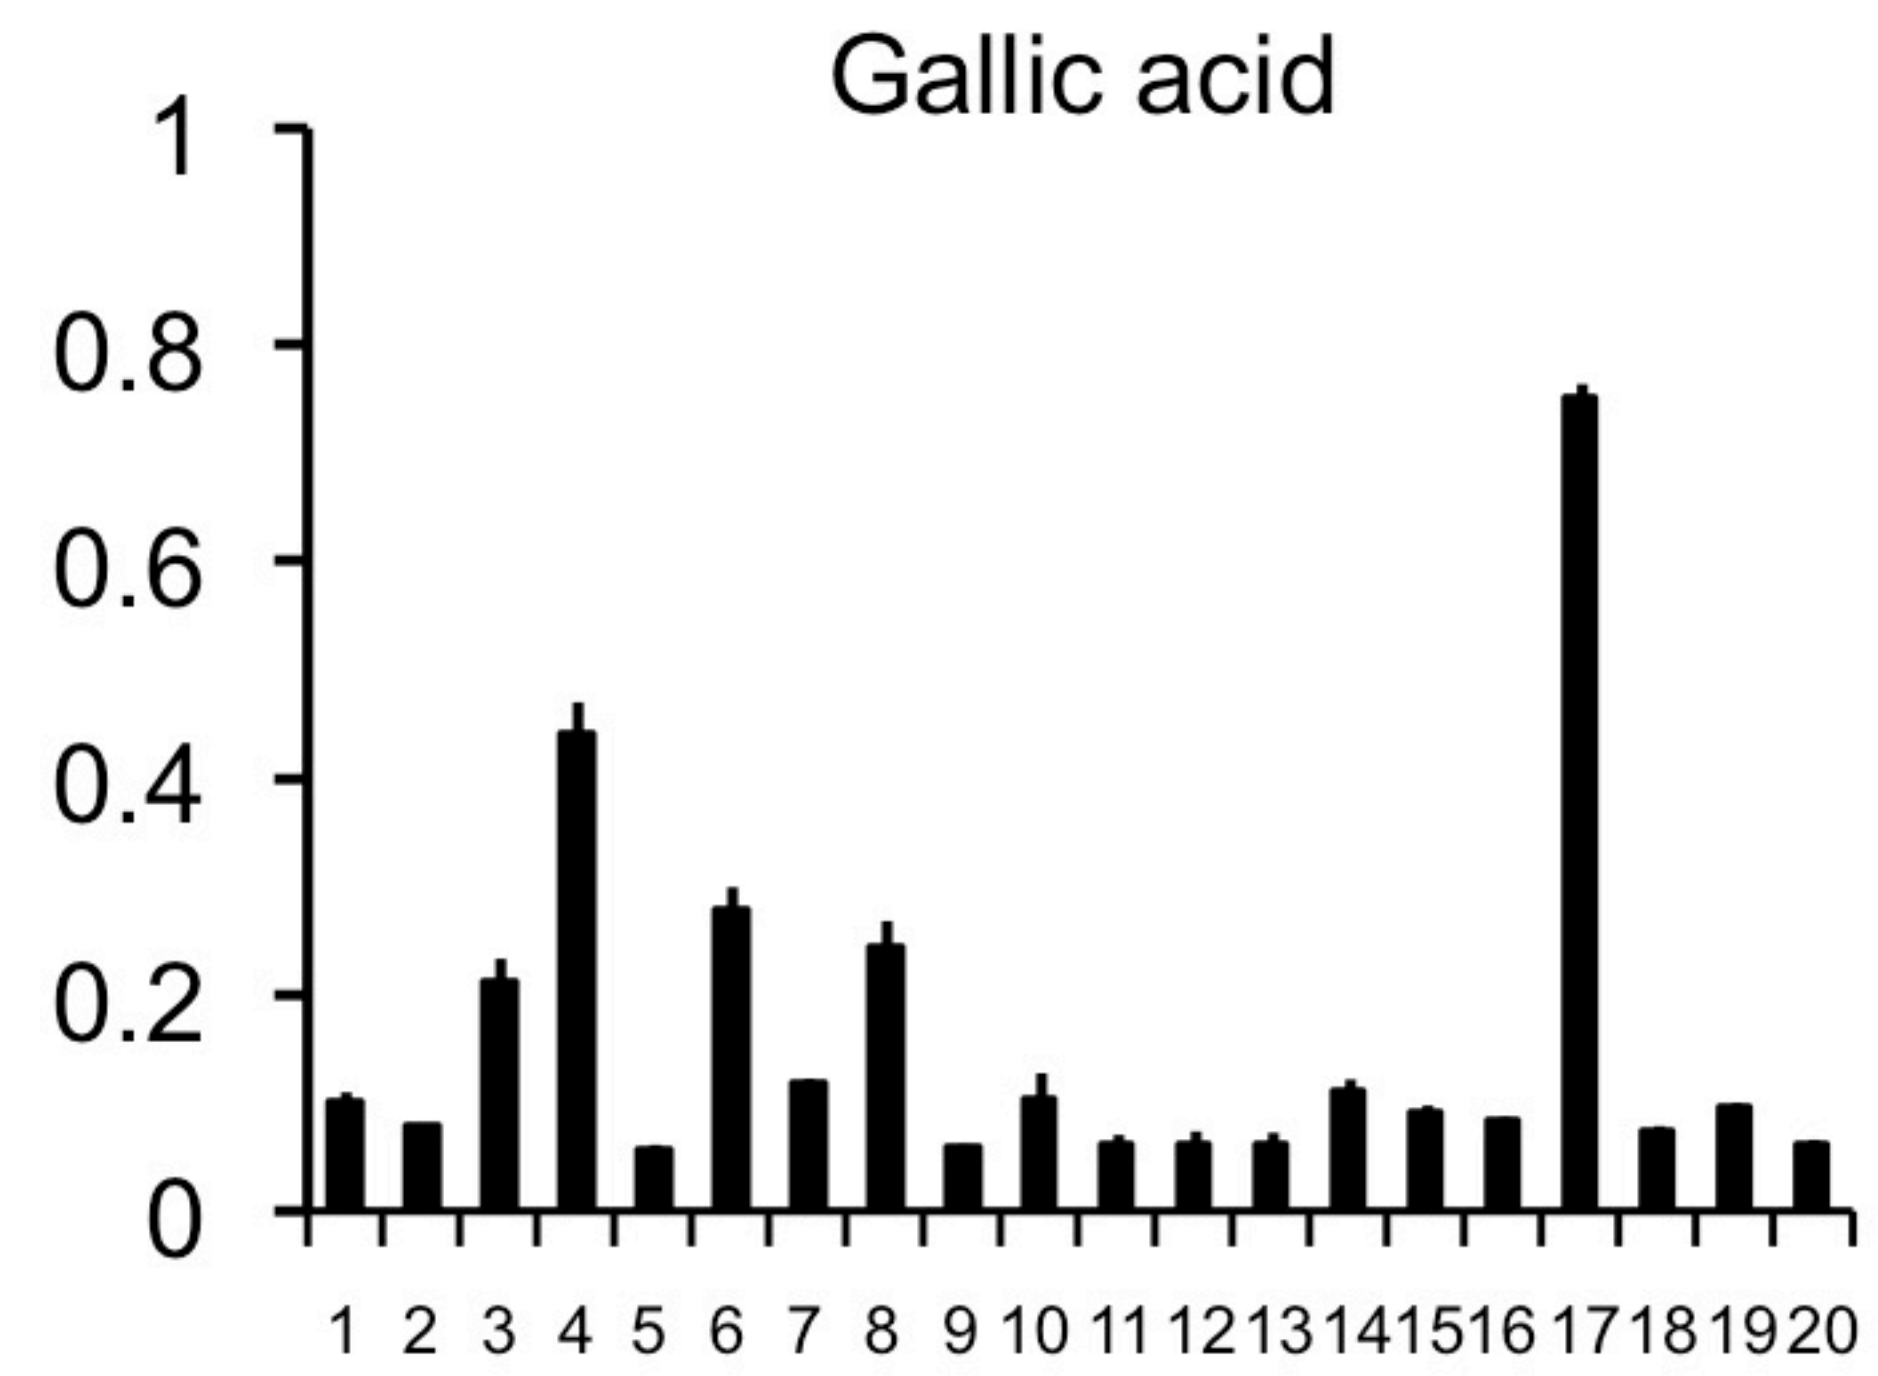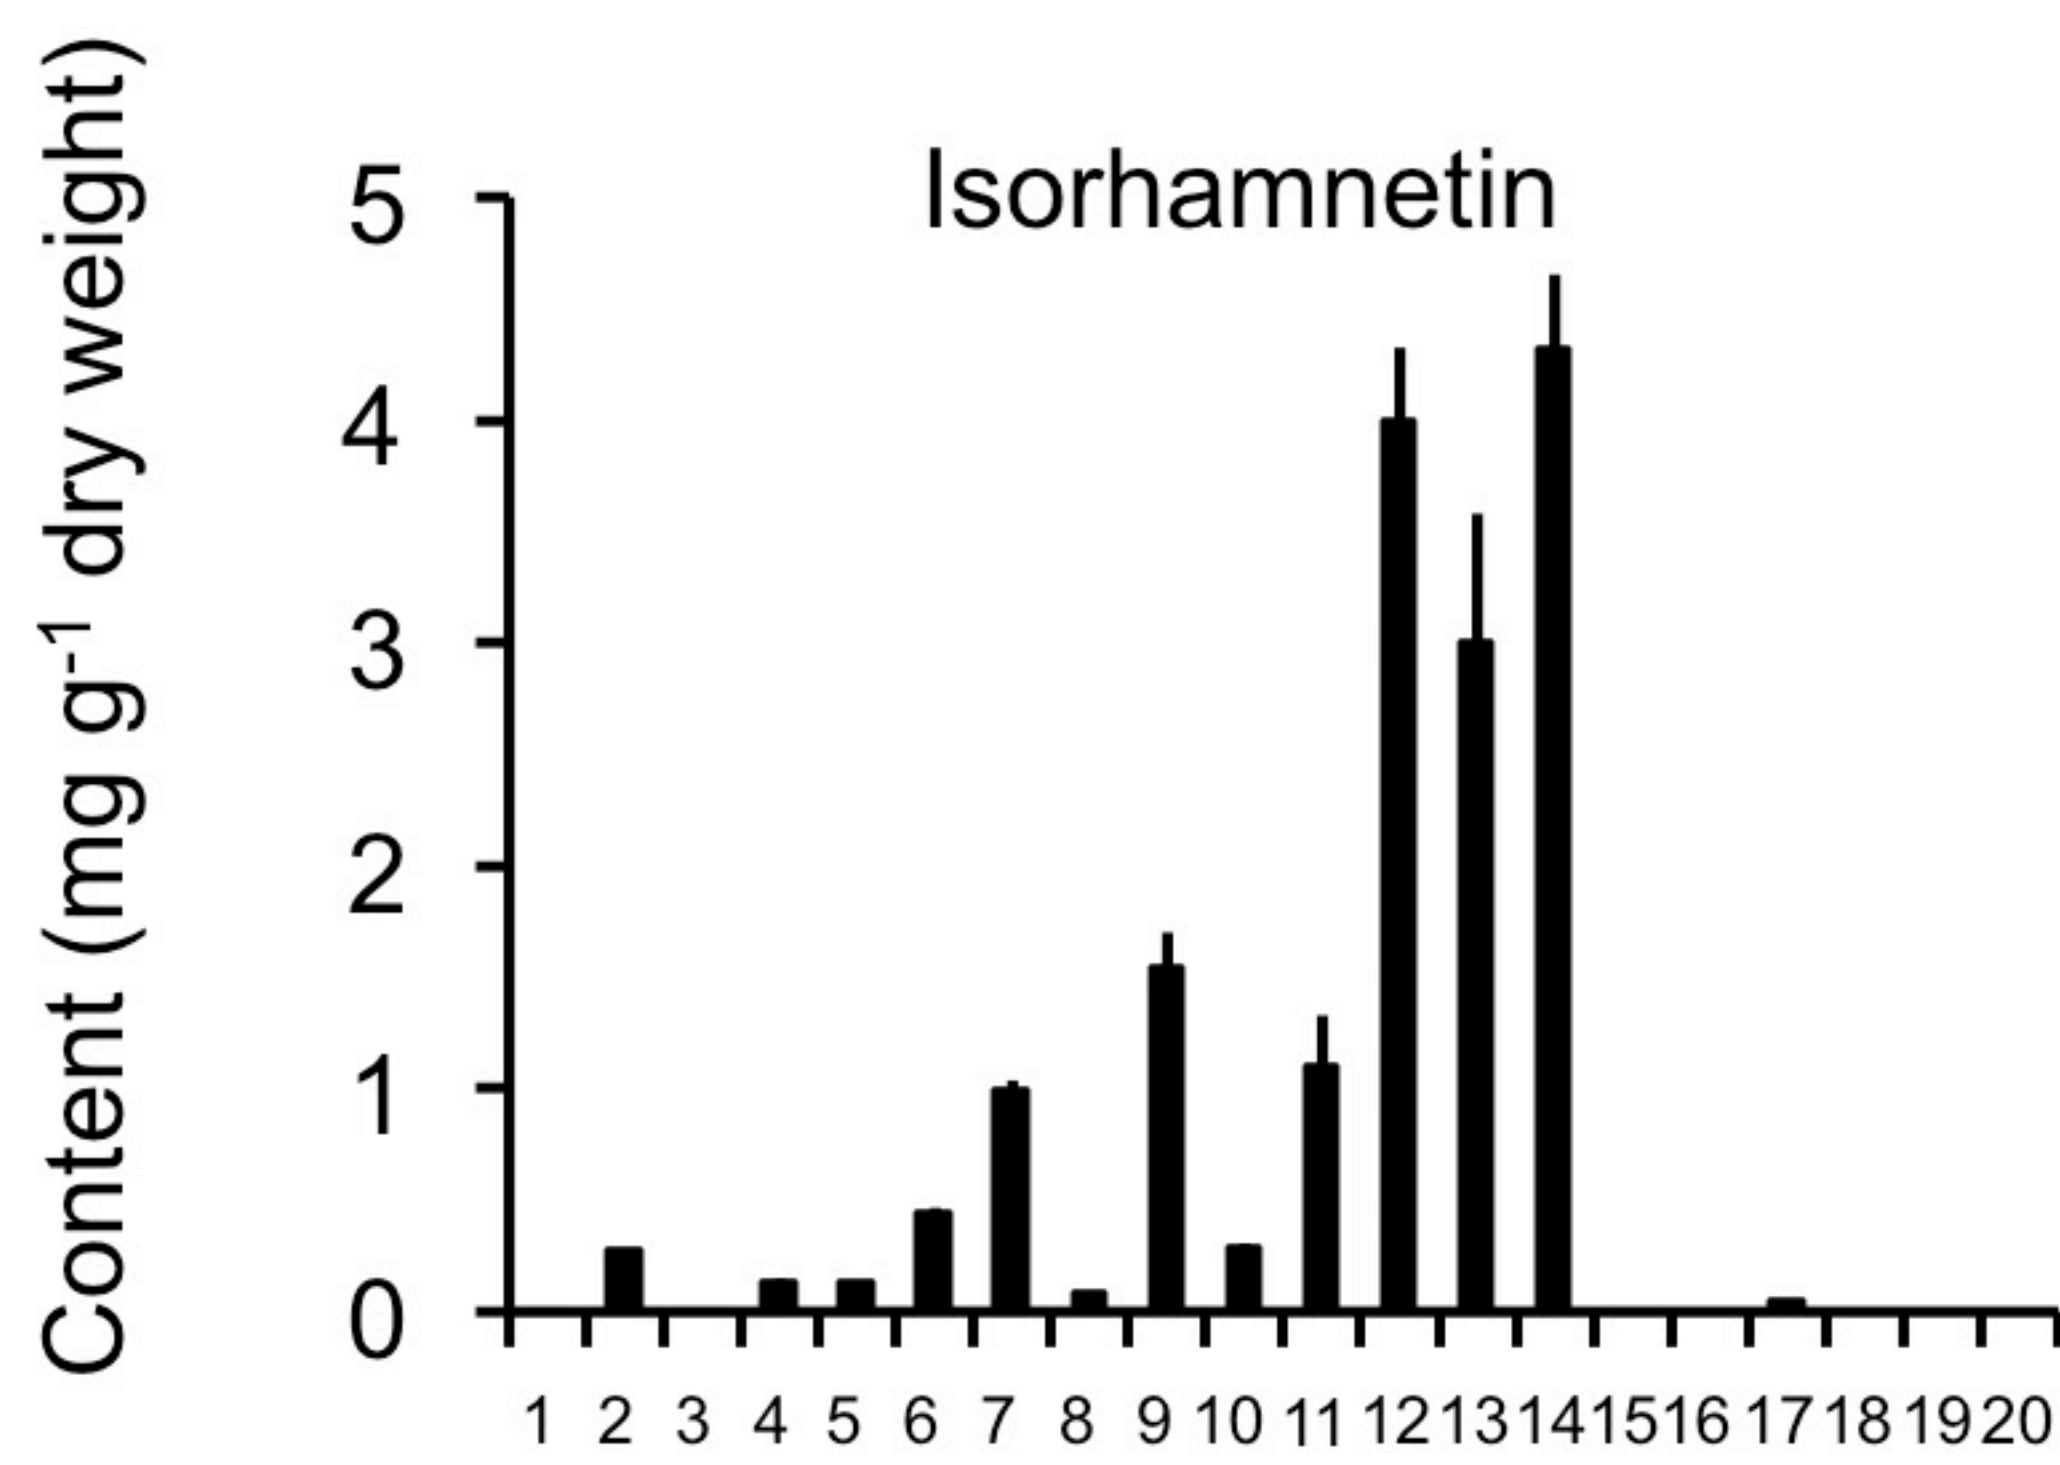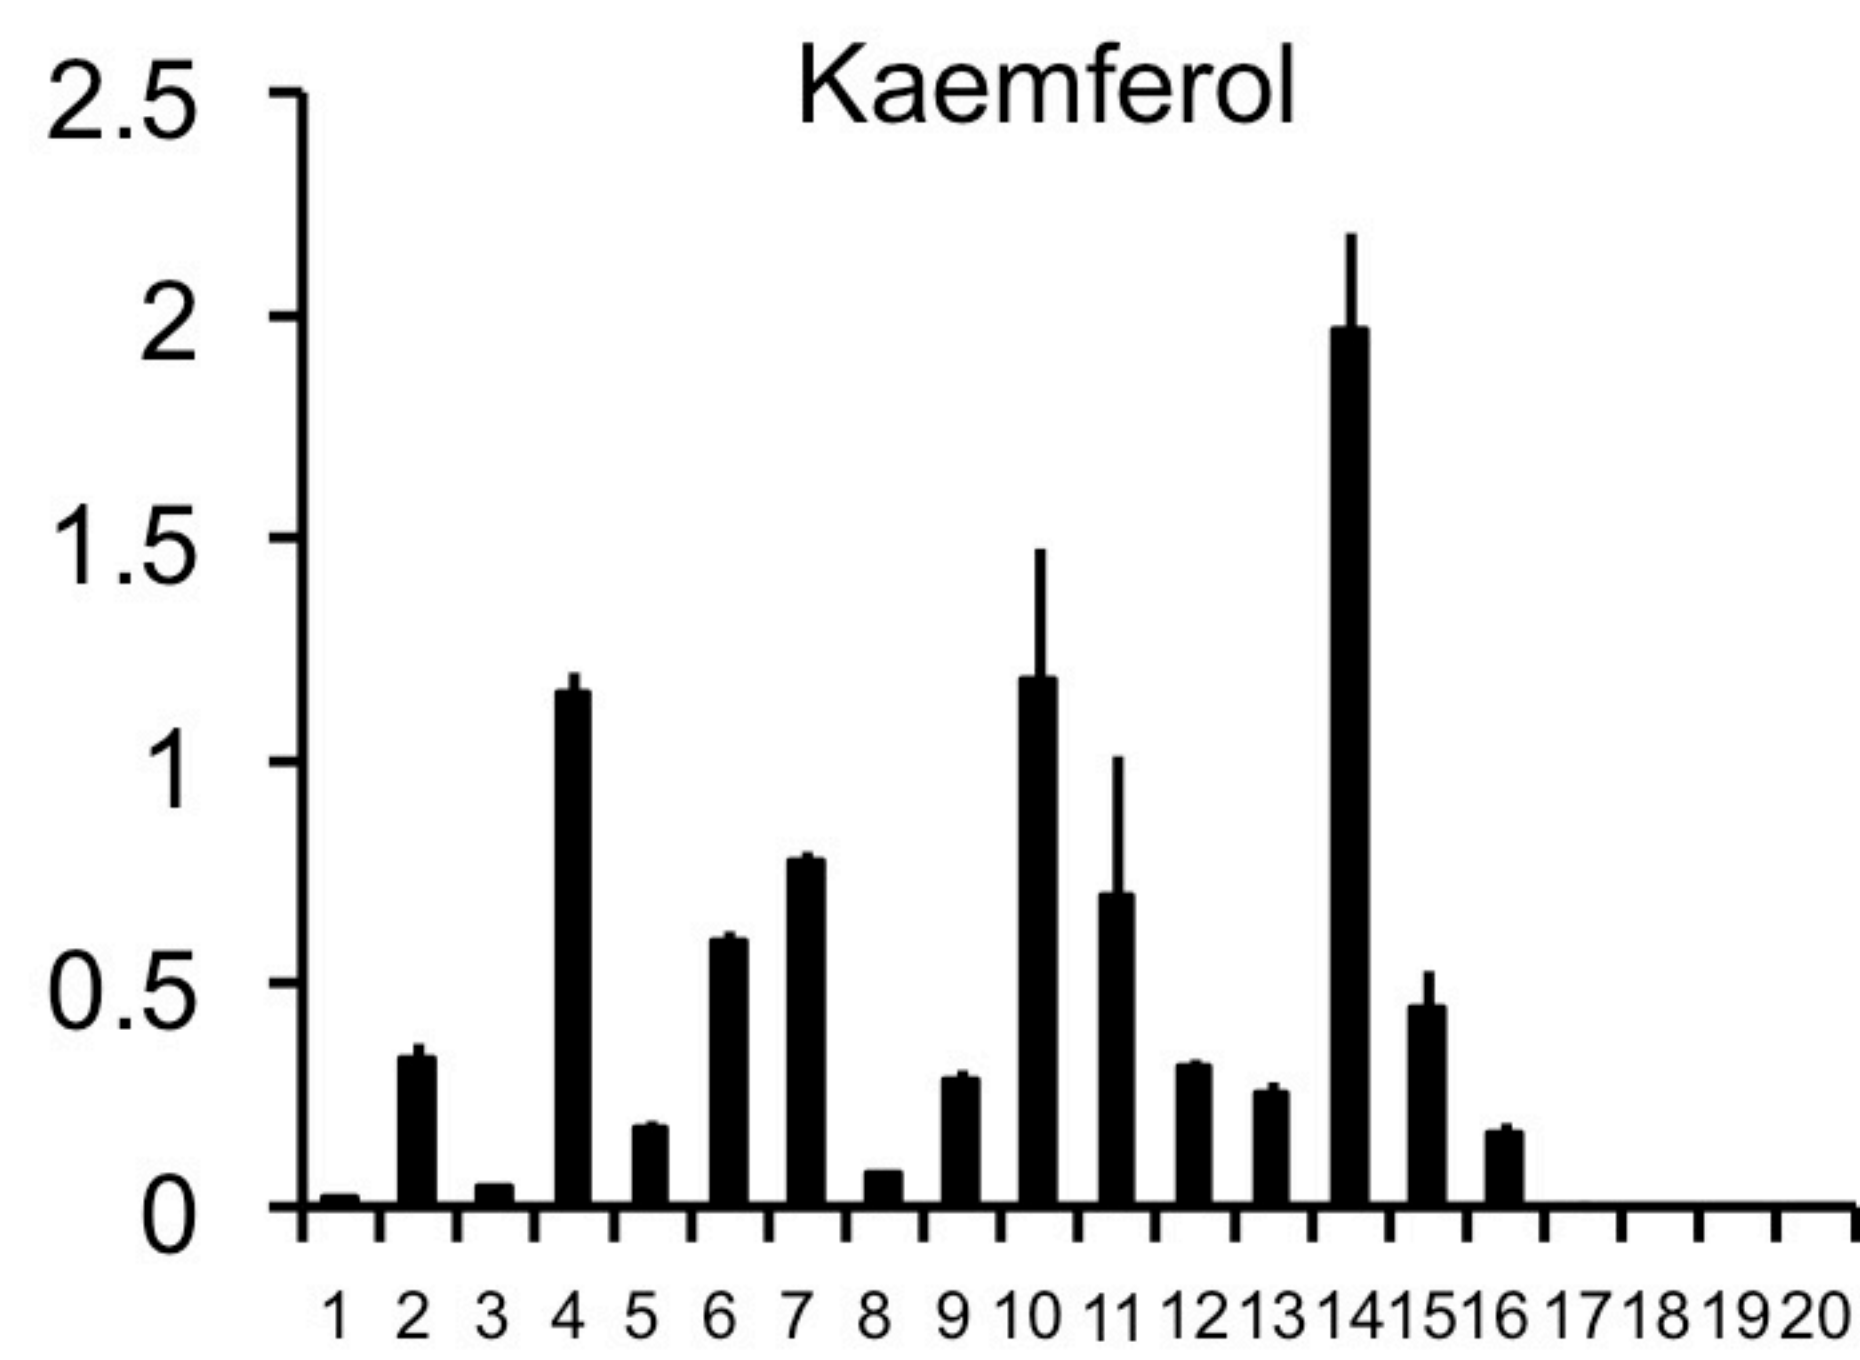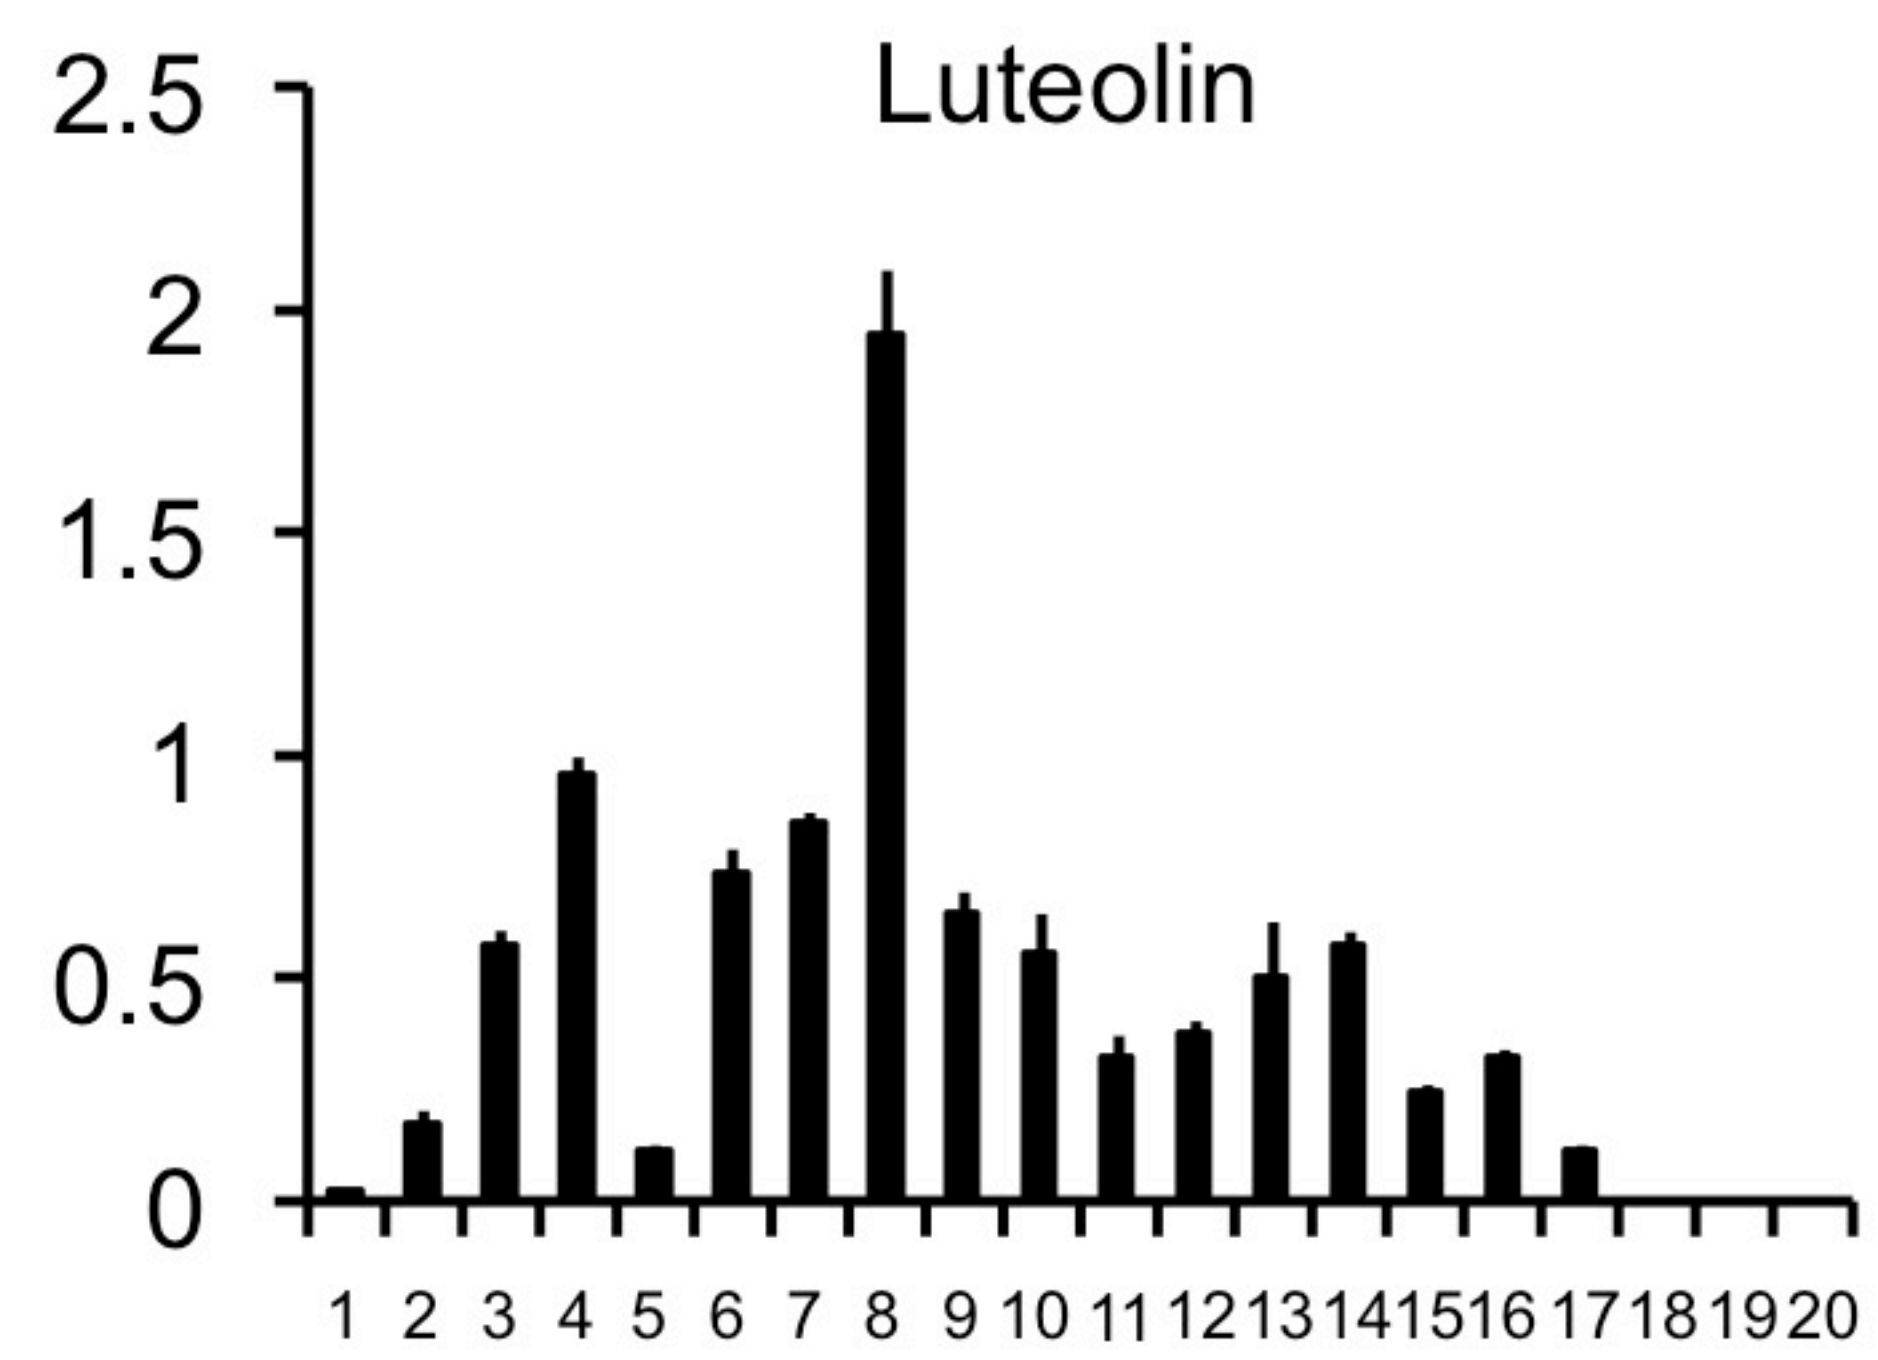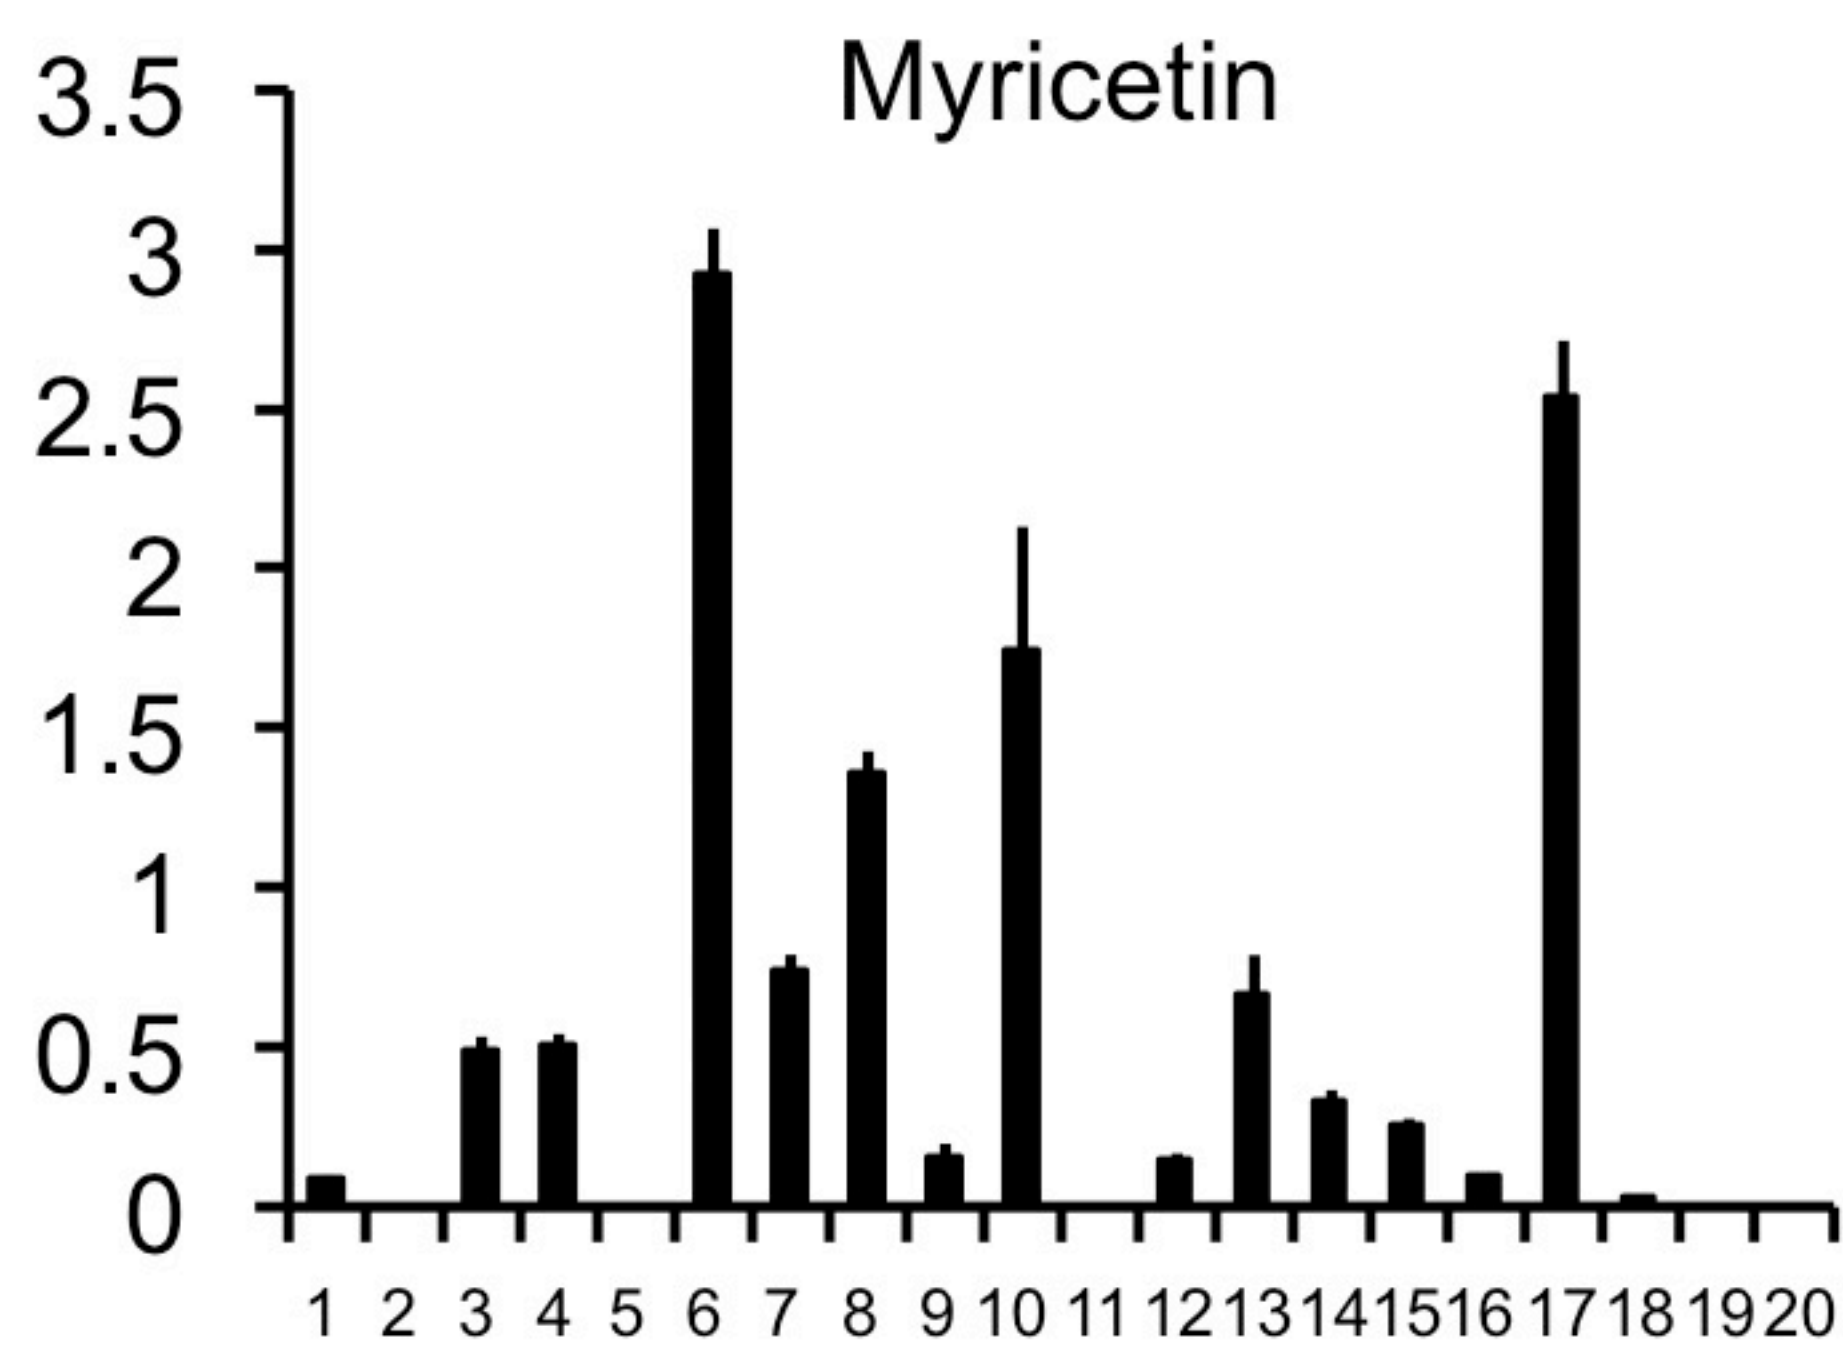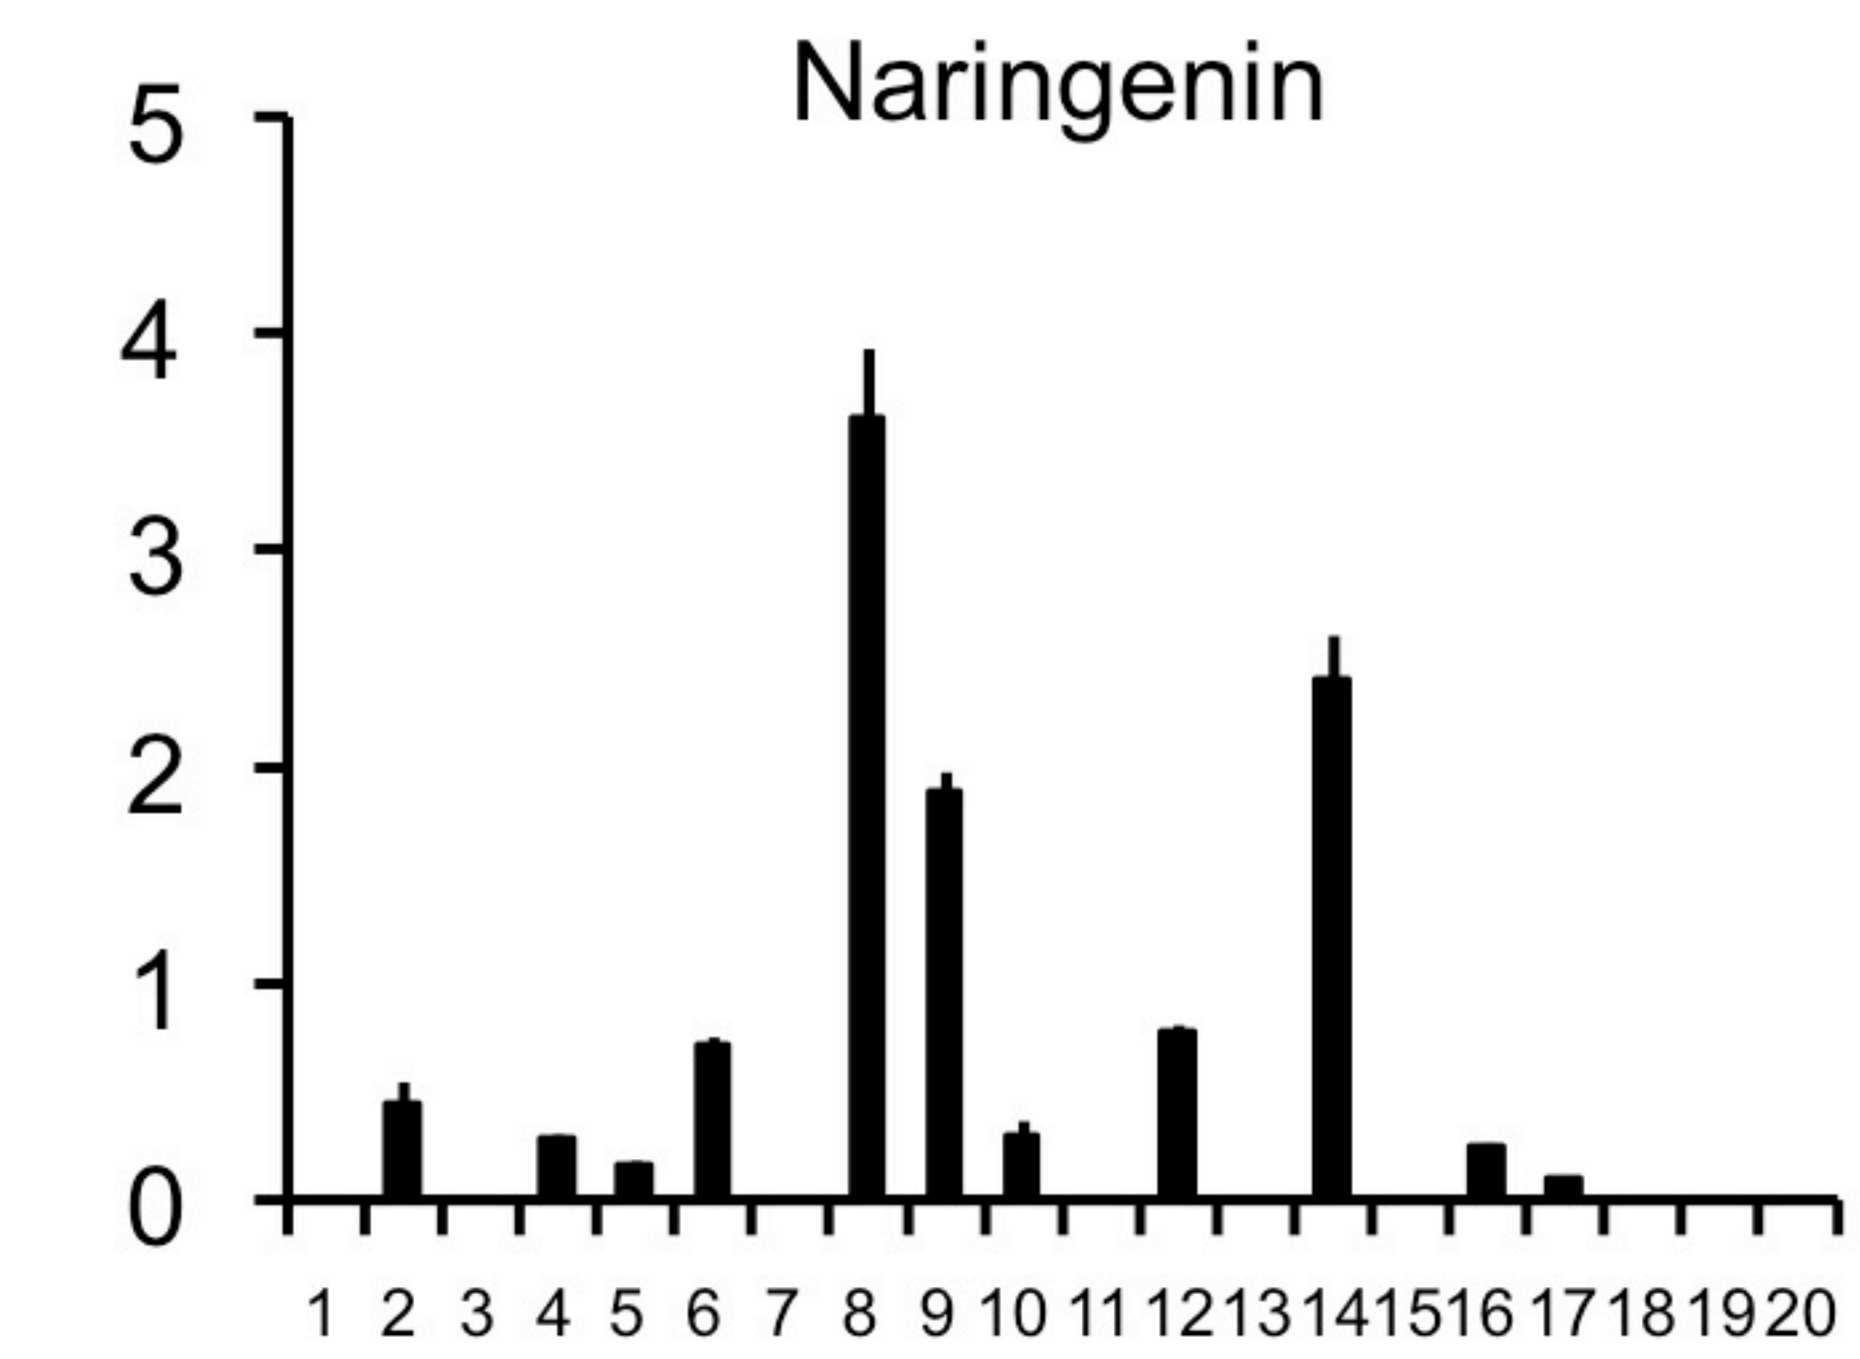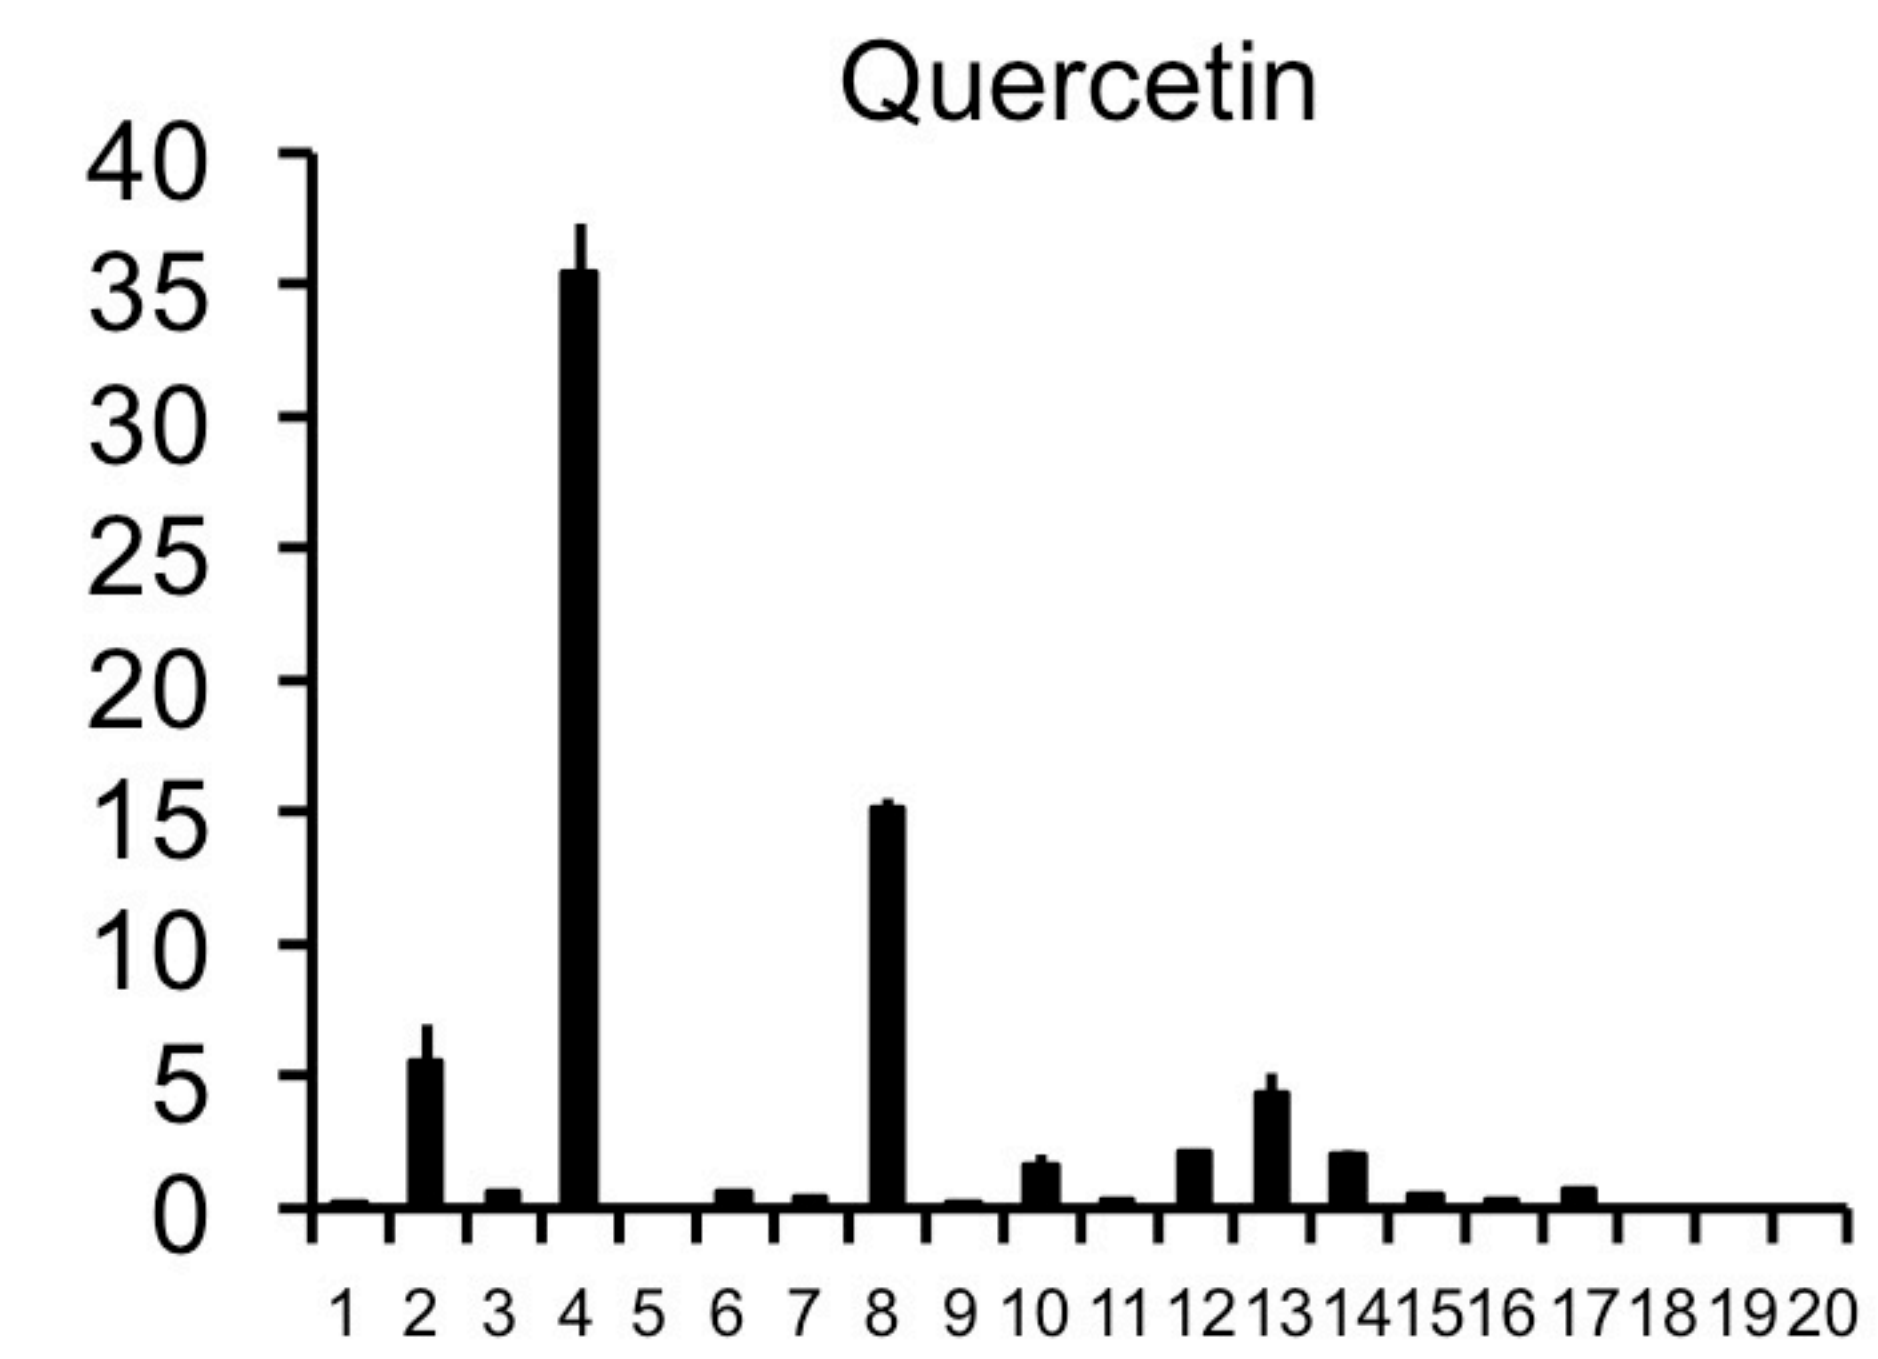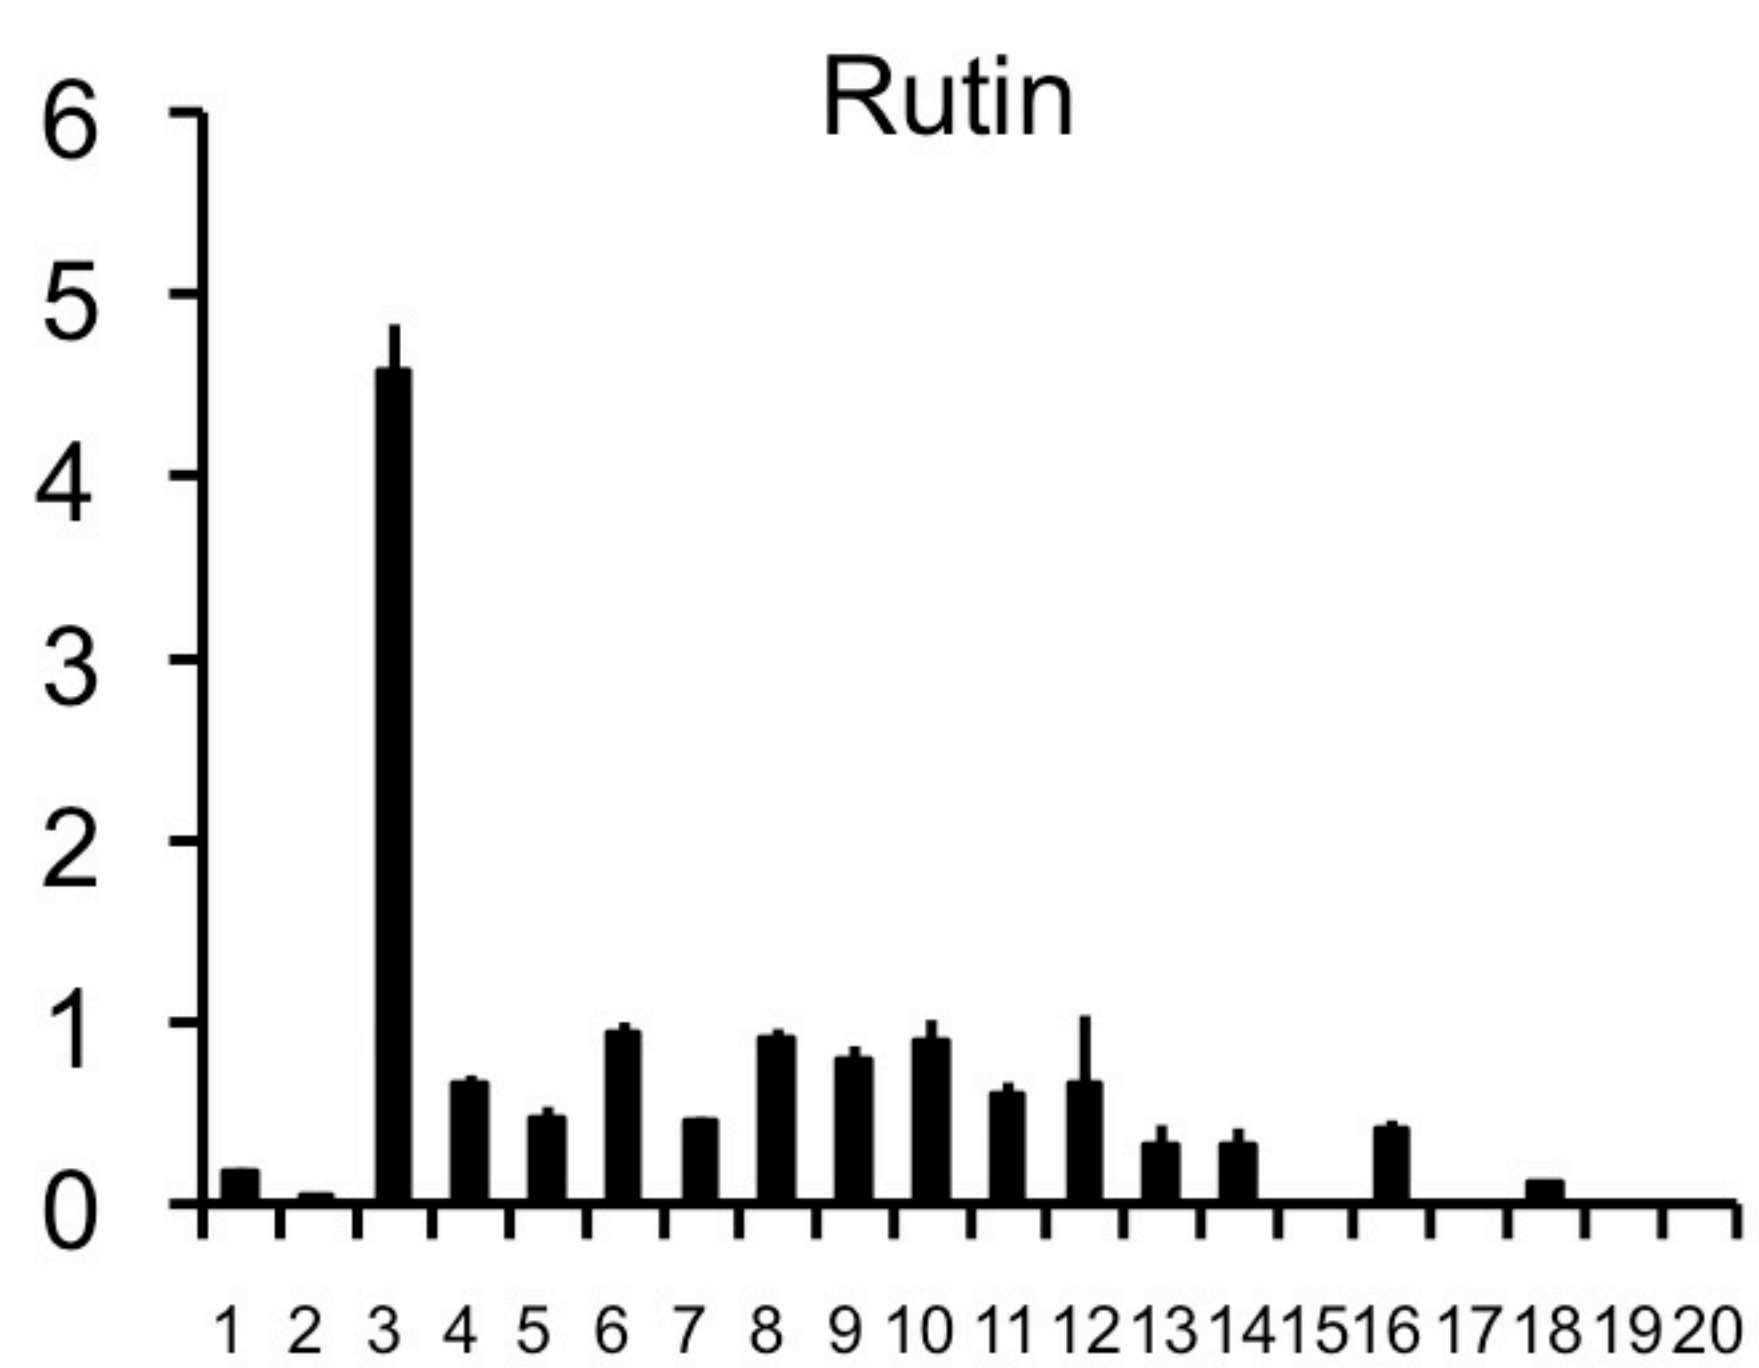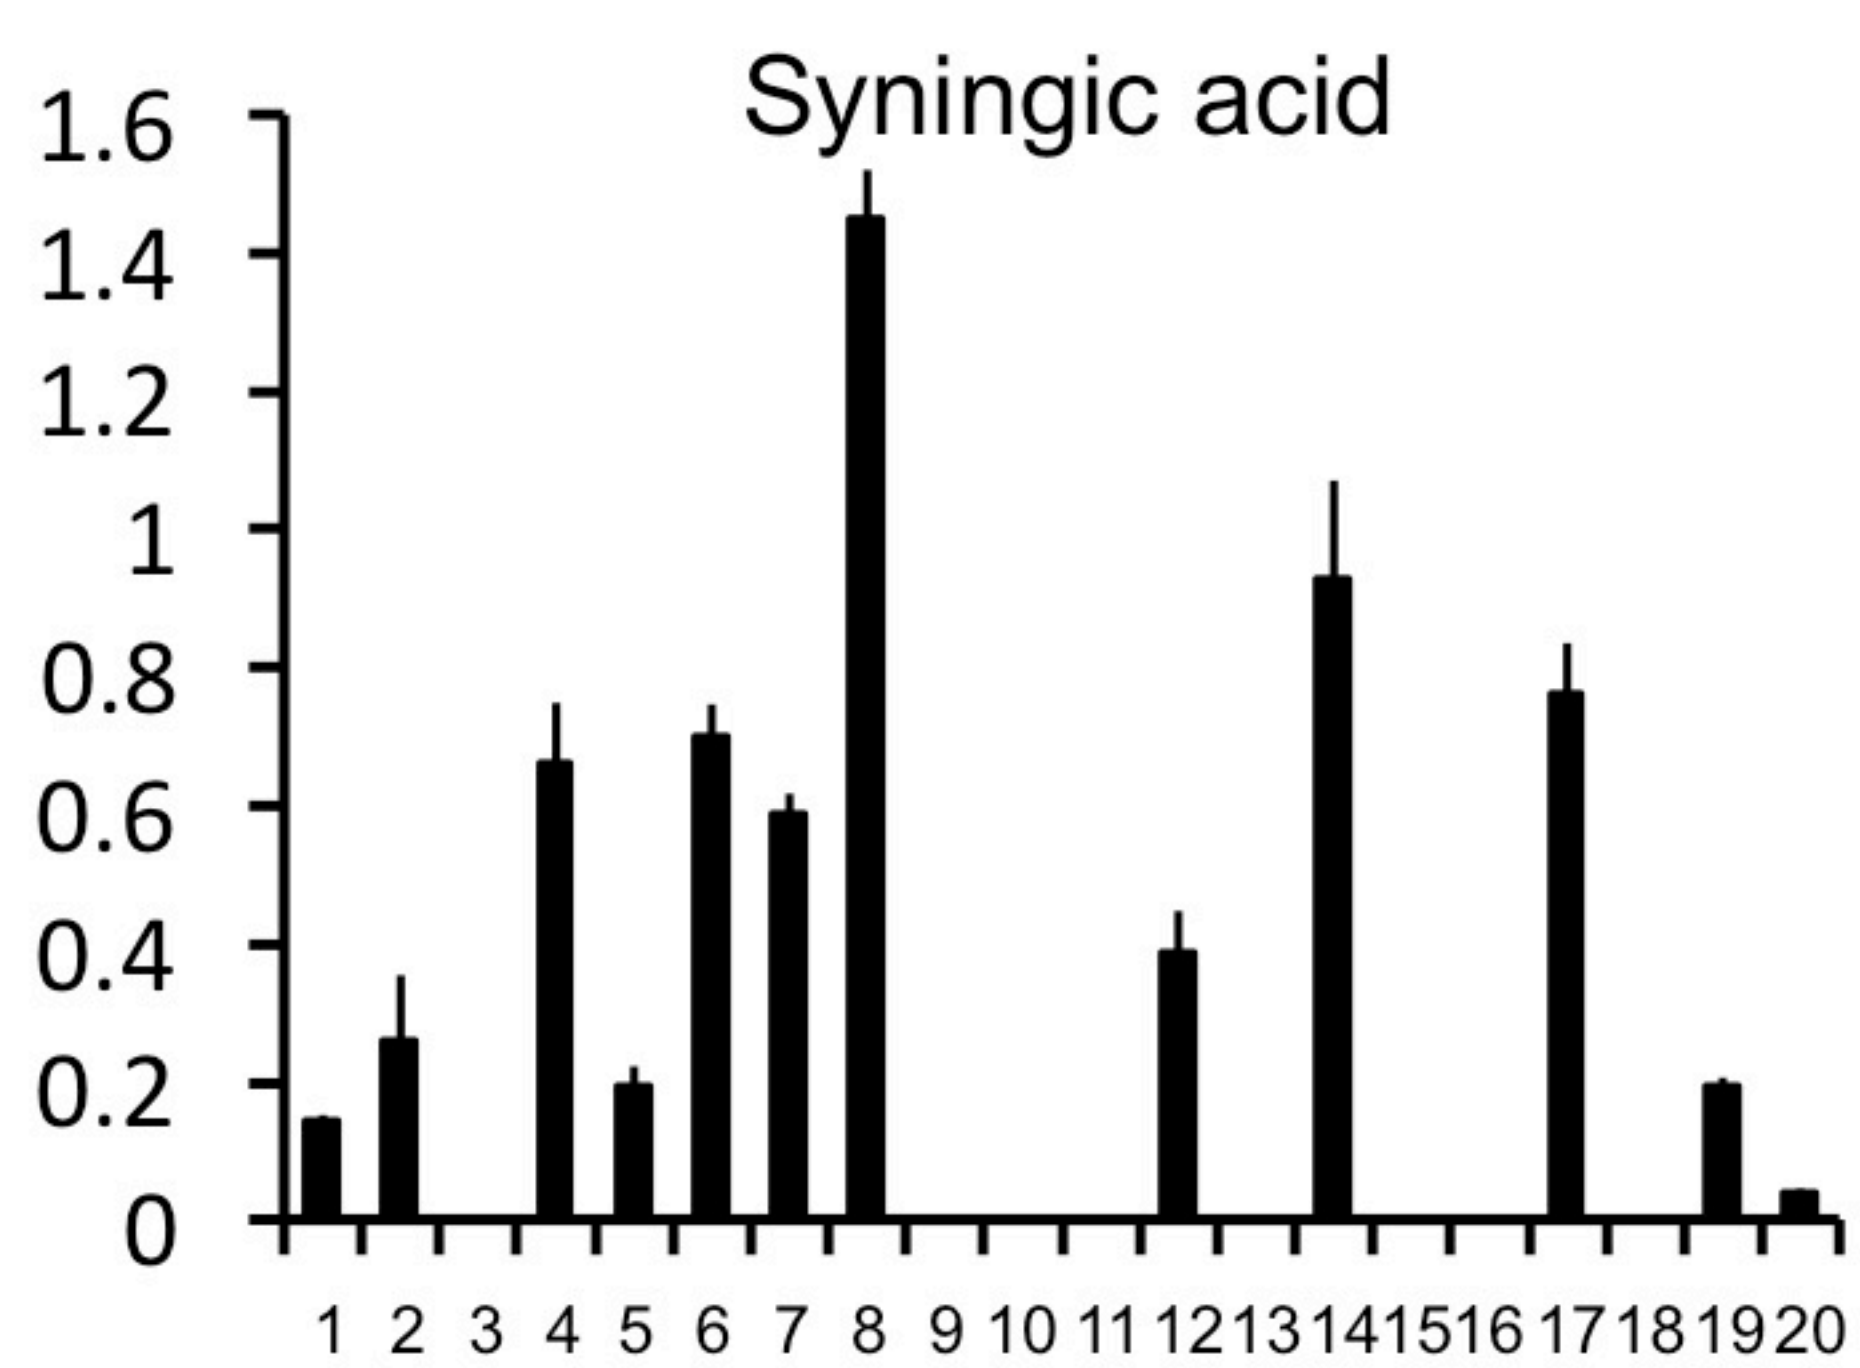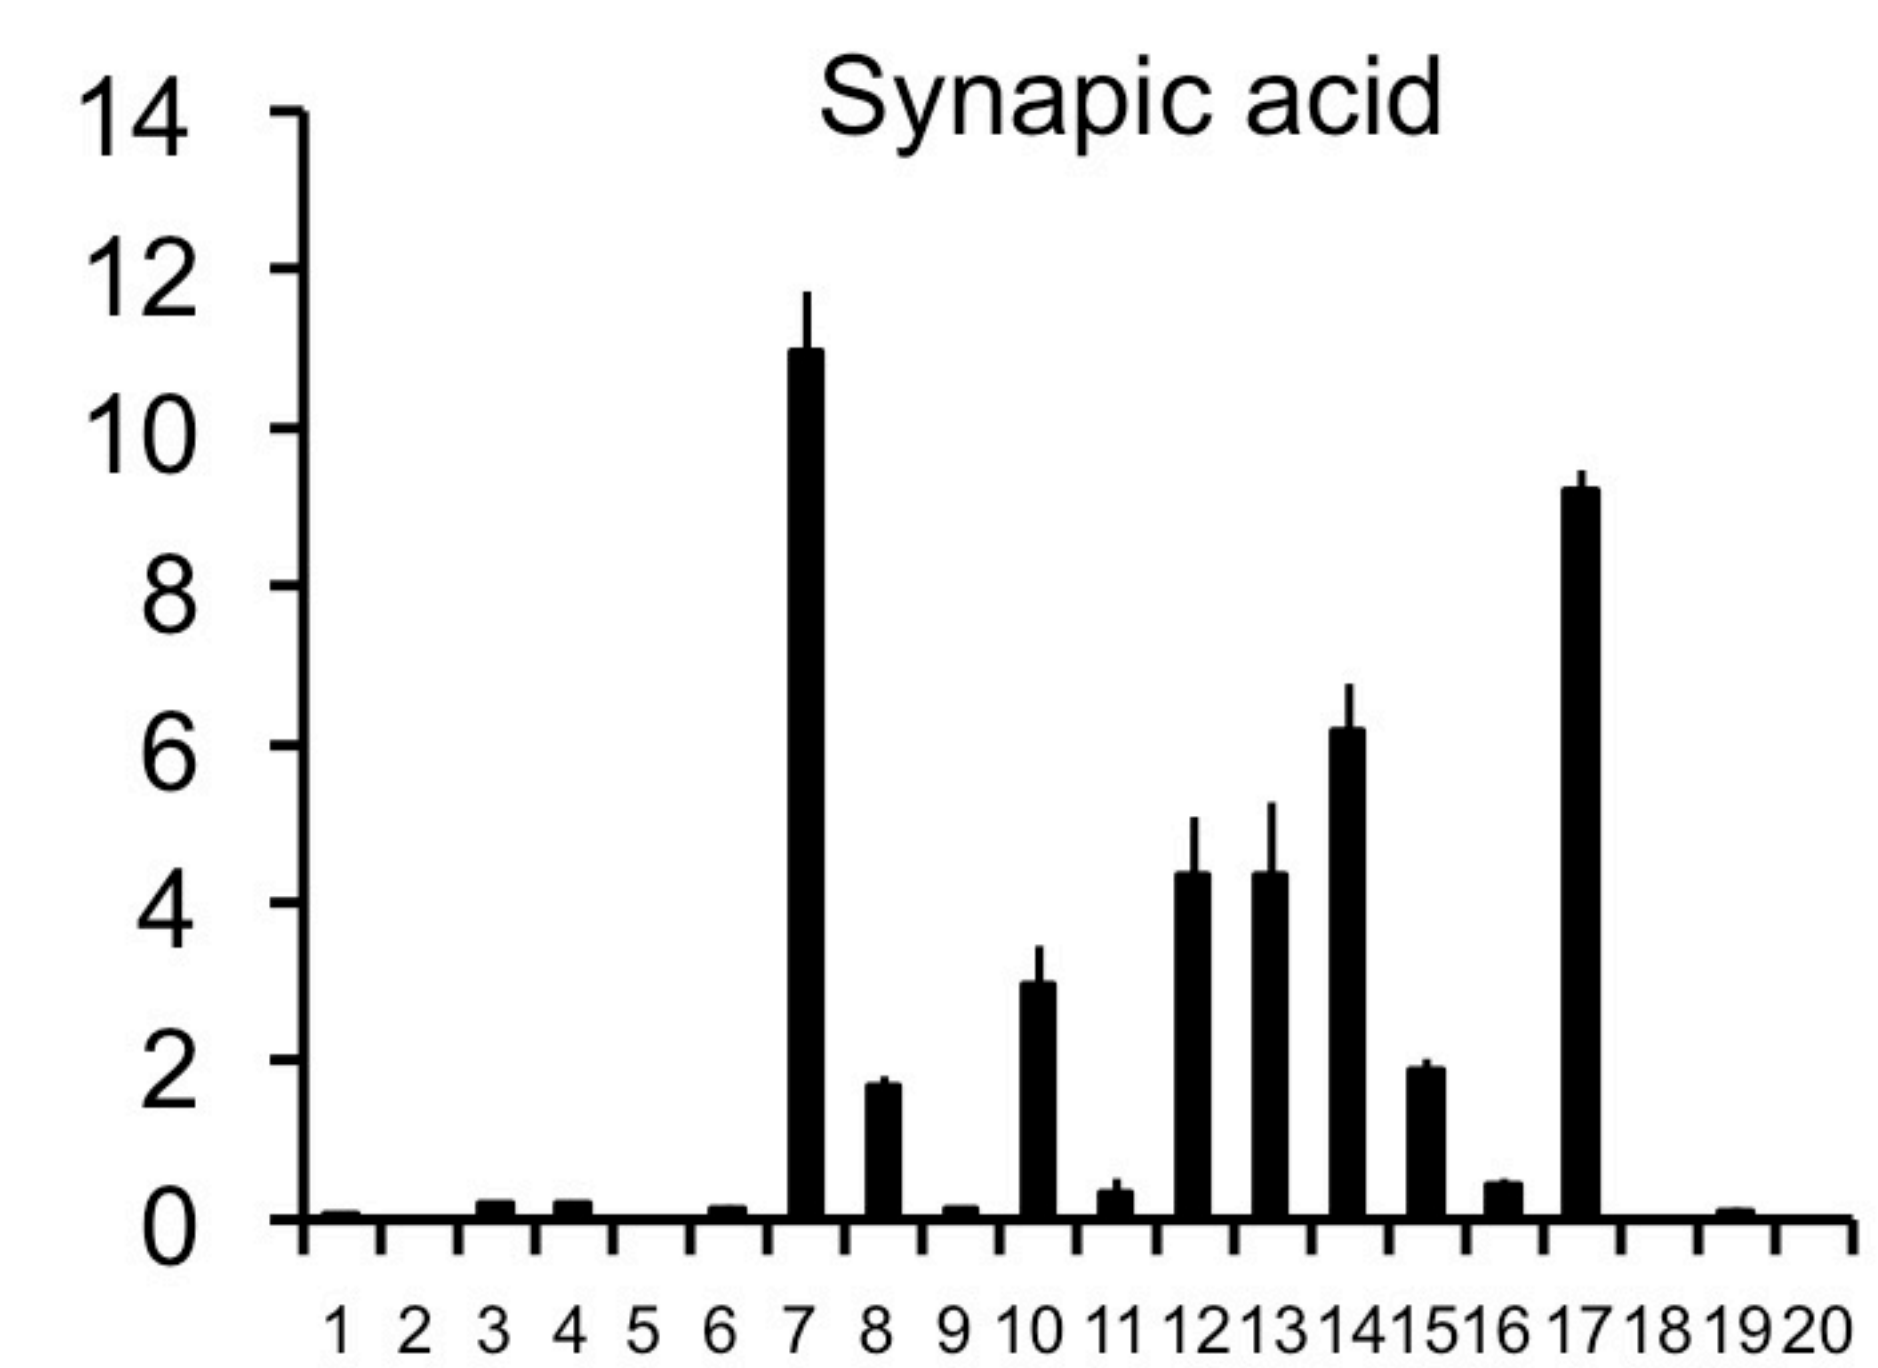

Species number
