# Supplementary material for: Metabolome analysis of 20 taxonomically related benzylisoquinoline alkaloid-producing plants
Source: PubMed Central journal article supplement (PMC4570626; doi:10.1186/s12870-015-0594-2), 2015-09-15
Supplement: 12870_2015_594_MOESM12_ESM.pdf [file 12870_2015_594_MOESM12_ESM.pdf]

| <i>m/z</i> ([M+H] <sup>+</sup> or [M] <sup>+</sup> ) | Composition                                                   | Compounds                                                                                                                                                                                                                                                                                |
|------------------------------------------------------|---------------------------------------------------------------|------------------------------------------------------------------------------------------------------------------------------------------------------------------------------------------------------------------------------------------------------------------------------------------|
| 272.12812                                            | C <sub>16</sub> H <sub>18</sub> NO <sub>3</sub>               | Higenamine / Demethylcoclaurine / Norcoclaurine                                                                                                                                                                                                                                          |
| 286.14377                                            | C <sub>17</sub> H <sub>20</sub> NO <sub>3</sub>               | Coclaurine / Morphine                                                                                                                                                                                                                                                                    |
| 292.09682                                            | C <sub>18</sub> H <sub>14</sub> N <sub>3</sub> O <sub>4</sub> | <i>N,O</i> -Dimethyliriodendronine                                                                                                                                                                                                                                                       |
| 296.12812                                            | C <sub>18</sub> H <sub>18</sub> NO <sub>3</sub>               | Fugapavine / Mecambrine / Roemerine <i>N</i> -oxide                                                                                                                                                                                                                                      |
| 298.14377                                            | C <sub>18</sub> H <sub>20</sub> NO <sub>3</sub>               | Codeinone / Isothebaidine / Oripavine                                                                                                                                                                                                                                                    |
| 300.15942                                            | C <sub>18</sub> H <sub>22</sub> NO <sub>3</sub>               | Codeine / <i>N</i> -Methylcoclaurine / Neopine                                                                                                                                                                                                                                           |
| 312.15942                                            | C <sub>19</sub> H <sub>22</sub> NO <sub>3</sub>               | Isothebaine / Orientinine / Pronuciferine / Thebaine                                                                                                                                                                                                                                     |
| 314.13868                                            | C <sub>18</sub> H <sub>20</sub> NO <sub>4</sub>               | Breogindine / Claviculine / Culacorine / Norcularidine / Norcularidine                                                                                                                                                                                                                   |
| 314.17507                                            | C <sub>19</sub> H <sub>24</sub> NO <sub>3</sub>               | Armepavine                                                                                                                                                                                                                                                                               |
| 316.15433                                            | C <sub>18</sub> H <sub>22</sub> NO <sub>4</sub>               | Codeine <i>N</i> -oxide / 14β-Hydroxycodeine / Nororientaline / Norreticuline /                                                                                                                                                                                                          |
| 320.09173                                            | C <sub>19</sub> H <sub>14</sub> NO <sub>4</sub>               | Coptisine / Pseudocoptisine                                                                                                                                                                                                                                                              |
| 322.10738                                            | C <sub>19</sub> H <sub>16</sub> NO <sub>4</sub>               | Berberrubine / Dihydrocoptisine / Dehydrocheilanthifoline / Deoxythalidastine / Escholamine / Thalifaurine / Thalifendine                                                                                                                                                                |
| 324.12303                                            | C <sub>19</sub> H <sub>18</sub> NO <sub>4</sub>               | Eschscholtzine / Stylopine                                                                                                                                                                                                                                                               |
| 326.13868                                            | C <sub>19</sub> H <sub>20</sub> NO <sub>4</sub>               | Amurine / Amurensine / Caryachine / Chelanthifoline / Dehydroisoboldine / <i>O,O</i> -Dimethylongifolonine / Domesticine / Isodomesticine / Nandinine / Nornantenine / Palaudine / Pacodine                                                                                              |
| 326.17507                                            | C <sub>20</sub> H <sub>24</sub> NO <sub>3</sub>               | <i>N</i> -Methylisothebaine / <i>O</i> -Methylorientine                                                                                                                                                                                                                                  |
| 328.15433                                            | C <sub>19</sub> H <sub>22</sub> NO <sub>4</sub>               | Bisnorargemonine / Bracteoline / Coreximine / Corytuberine / Dehydroreticuline / Discretamine / 16-Hydroxythebaine / Isoboldine / Munitagenine / Norcorydine / Orientalinone / Pallidine / Salutaridine / Scoulerine / Stepholidine / Thalidicine / Thalidine / Thebaine <i>N</i> -oxide |
| 328.19072                                            | C <sub>20</sub> H <sub>26</sub> NO <sub>3</sub>               | <i>N</i> -Methylarmepavine                                                                                                                                                                                                                                                               |
| 330.16998                                            | C <sub>19</sub> H <sub>24</sub> NO <sub>4</sub>               | Dihydroorientalinone / Ocobotrine / Orientaline / Reticuline / Salutaridinol                                                                                                                                                                                                             |
| 332.09173                                            | C <sub>20</sub> H <sub>14</sub> NO <sub>4</sub>               | Sanguinarine                                                                                                                                                                                                                                                                             |
| 334.10738                                            | C <sub>20</sub> H <sub>16</sub> NO <sub>4</sub>               | Dihydrosanguinarine / Norchelerythrine                                                                                                                                                                                                                                                   |

|           |                                                 |                                                                                                                                                                                                                                                                                                                                                                |
|-----------|-------------------------------------------------|----------------------------------------------------------------------------------------------------------------------------------------------------------------------------------------------------------------------------------------------------------------------------------------------------------------------------------------------------------------|
| 336.12303 | C <sub>20</sub> H <sub>18</sub> NO <sub>4</sub> | Berberine / Berbericine / Epiberberine / Pseudoberberine                                                                                                                                                                                                                                                                                                       |
| 338.10230 | C <sub>19</sub> H <sub>16</sub> NO <sub>5</sub> | Arosinine / Thalidastine                                                                                                                                                                                                                                                                                                                                       |
| 338.13868 | C <sub>20</sub> H <sub>20</sub> NO <sub>4</sub> | Californidine / Columbamine / Dehydrodiscretine / Jatrorrhizine / <i>N</i> -Methylcalifornine / <i>N</i> -Methylescholzine / <i>N</i> -Methylstylophine / Palmatrubine / Pseudocolumbamine / Pseudojatrorrhizine                                                                                                                                               |
| 340.11795 | C <sub>19</sub> H <sub>18</sub> NO <sub>5</sub> | Eschscholtzine <i>N</i> -oxide / 13-Hydroxystylophine / Norchelidonine                                                                                                                                                                                                                                                                                         |
| 340.15433 | C <sub>20</sub> H <sub>22</sub> NO <sub>4</sub> | Amurensinine / Canadine / Domestine / Eschscholtzidine / Escholdine / <i>N</i> -Methylpalaudium / Papaverine / Reframine / Sinactine                                                                                                                                                                                                                           |
| 342.13360 | C <sub>19</sub> H <sub>20</sub> NO <sub>5</sub> | Bulbocapnine <i>N</i> -oxide / Hydroxybulbocapnine                                                                                                                                                                                                                                                                                                             |
| 342.16998 | C <sub>20</sub> H <sub>24</sub> NO <sub>4</sub> | Corydine / Corypalmine / Cyclanoline / Fuzitine / Isocorydine / Isocorypalmine / Isonorargemonine / Magnoflorine / <i>N</i> -Methylauroretanine / <i>O</i> -Methylisoboldine / <i>O</i> -Methylflavinanthine / Norargemonine / Platycerine / Tetrahydrocolumbamine / Tetrahydrojatrorrhizine / Tetrahydropapaverine / Thalispavine / Trilobinine / Zizyphusine |
| 344.14925 | C <sub>19</sub> H <sub>22</sub> NO <sub>5</sub> | Danguyelline / Salutaridine <i>N</i> -oxide                                                                                                                                                                                                                                                                                                                    |
| 344.18563 | C <sub>20</sub> H <sub>26</sub> NO <sub>4</sub> | Codamine / Laudanidine / Laudanine / Norlaudanoline / Tembetarine / Thalifendlerine                                                                                                                                                                                                                                                                            |
| 348.08665 | C <sub>20</sub> H <sub>14</sub> NO <sub>5</sub> | Oxysanguinarine                                                                                                                                                                                                                                                                                                                                                |
| 348.12303 | C <sub>21</sub> H <sub>18</sub> NO <sub>4</sub> | Chelerythrine / Nitidine                                                                                                                                                                                                                                                                                                                                       |
| 350.13868 | C <sub>21</sub> H <sub>20</sub> NO <sub>4</sub> | Dihydrochelerythrine                                                                                                                                                                                                                                                                                                                                           |
| 352.11795 | C <sub>20</sub> H <sub>18</sub> NO <sub>5</sub> | Berberastine / Glauvine / Oxyglauvine / Oxyberberine                                                                                                                                                                                                                                                                                                           |
| 352.15433 | C <sub>21</sub> H <sub>22</sub> NO <sub>4</sub> | Palmatine / Pseudopalmatine / Thalphenine                                                                                                                                                                                                                                                                                                                      |
| 354.13360 | C <sub>20</sub> H <sub>20</sub> NO <sub>5</sub> | Chelidonine / Papaveraldine / Protopine / Pseudoprotopine / Thalimicrinone / Thalprzewalskiinone                                                                                                                                                                                                                                                               |
| 354.16998 | C <sub>21</sub> H <sub>24</sub> NO <sub>4</sub> | Dehydroglauvine / <i>N</i> -Methylcanadine / <i>N</i> -Methylnantenine / Takatonine                                                                                                                                                                                                                                                                            |

|           |                                                 |                                                                                                                                                                                                    |
|-----------|-------------------------------------------------|----------------------------------------------------------------------------------------------------------------------------------------------------------------------------------------------------|
| 356.14925 | C <sub>20</sub> H <sub>22</sub> NO <sub>5</sub> | Baicaline / 2-Demethylthalimonine / 9-Demethylthalimonine / Dihydroprotopine / 4-Hydroxyeschscholtzidine / Hydroxynantenine / N-Hydroxynorthalictuberine / N-Methylcassythine / O-Methylcassythine |
| 356.18563 | C <sub>21</sub> H <sub>26</sub> NO <sub>4</sub> | Argemonine / Escholinine / Glaucine / O-Methylplatycerinium / N-Methyltetrahydrocolumbamine / Tetrahydropalmatine / Thalictuberine / Xanthoplanine                                                 |
| 358.16490 | C <sub>20</sub> H <sub>24</sub> NO <sub>5</sub> | Delporphine Menispermine / N-Methyldanguyelline / Noroconovine / Thalbaicaline / Thalictuberine N-oxide                                                                                            |
| 358.20128 | C <sub>21</sub> H <sub>28</sub> NO <sub>4</sub> | Laudanosine / N-Methyltetrahydropapaverine                                                                                                                                                         |
| 362.10230 | C <sub>21</sub> H <sub>16</sub> NO <sub>5</sub> | Chelirubine                                                                                                                                                                                        |
| 364.11795 | C <sub>21</sub> H <sub>18</sub> NO <sub>5</sub> | Dihydrochelirubine / Oxochelelythrine                                                                                                                                                              |
| 368.11341 | C <sub>21</sub> H <sub>18</sub> NO <sub>5</sub> | Bicuculline / Capnoidine                                                                                                                                                                           |
| 368.14925 | C <sub>21</sub> H <sub>22</sub> NO <sub>5</sub> | N-Methylpapaveraldine                                                                                                                                                                              |
| 370.12851 | C <sub>20</sub> H <sub>20</sub> NO <sub>6</sub> | Isorhoeagenine / Papaverrubine A / Papaverrubine E / Rhoeagenine                                                                                                                                   |
| 370.16490 | C <sub>21</sub> H <sub>24</sub> NO <sub>5</sub> | Allocryptopine / Cryptopine / Canadalin                                                                                                                                                            |
| 370.20128 | C <sub>22</sub> H <sub>28</sub> NO <sub>4</sub> | Corydaline / N-Methyltetrahydropalmatine                                                                                                                                                           |
| 374.19620 | C <sub>21</sub> H <sub>28</sub> NO <sub>5</sub> | 2'-Hydroxylaudanosine                                                                                                                                                                              |
| 378.09721 | C <sub>21</sub> H <sub>16</sub> NO <sub>6</sub> | Oxochelelythrine                                                                                                                                                                                   |
| 378.13360 | C <sub>22</sub> H <sub>20</sub> NO <sub>5</sub> | Chelilutine                                                                                                                                                                                        |
| 384.14416 | C <sub>21</sub> H <sub>22</sub> NO <sub>6</sub> | Hydrastine / Isorhoeadine / Oxocryptopine / Rhoeadine                                                                                                                                              |
| 384.18055 | C <sub>22</sub> H <sub>26</sub> NO <sub>5</sub> | Dehydrothalicimidine / Thali hazine                                                                                                                                                                |
| 386.15981 | C <sub>21</sub> H <sub>24</sub> NO <sub>6</sub> | Glaucamine / N-Methylporphyroxine / Papaverrubine B / Papaverrubine F / Preocoteine                                                                                                                |
| 392.11286 | C <sub>22</sub> H <sub>18</sub> NO <sub>6</sub> | Macarpine                                                                                                                                                                                          |
| 394.12851 | C <sub>22</sub> H <sub>20</sub> NO <sub>6</sub> | Dihydromacarpine                                                                                                                                                                                   |
| 398.15981 | C <sub>22</sub> H <sub>24</sub> NO <sub>6</sub> | Orientalidine                                                                                                                                                                                      |
| 400.13908 | C <sub>21</sub> H <sub>22</sub> NO <sub>7</sub> | Narcotoline                                                                                                                                                                                        |
| 400.17546 | C <sub>22</sub> H <sub>26</sub> NO <sub>6</sub> | Glaudine / Leucoxylinone / Macrantaldehyde / Mecambidine / N-Methylpapaverubine / 13-Oxomuramine / Oreophiline                                                                                     |
| 402.19111 | C <sub>22</sub> H <sub>28</sub> NO <sub>6</sub> | Macrantaline                                                                                                                                                                                       |
| 414.15473 | C <sub>22</sub> H <sub>24</sub> NO <sub>7</sub> | Noscapine                                                                                                                                                                                          |
| 416.17038 | C <sub>22</sub> H <sub>26</sub> NO <sub>7</sub> | Narcotine hemiacetal                                                                                                                                                                               |
| 428.17038 | C <sub>23</sub> H <sub>26</sub> NO <sub>7</sub> | N-Methylnarcotine                                                                                                                                                                                  |
