# Supplementary material for: Metabolome analysis of 20 taxonomically related benzylisoquinoline alkaloid-producing plants
Source: PubMed Central journal article supplement (PMC4570626; doi:10.1186/s12870-015-0594-2), 2015-09-15
Supplement: 12870_2015_594_MOESM14_ESM.pdf [file 12870_2015_594_MOESM14_ESM.pdf]

| No. | Compound       | [M+H] <sup>+</sup><br>or [M] <sup>+</sup> | RT<br>(min) | CE<br>(eV) | ESI[+]-CID spectrum <i>m/z</i> (Relative intensity)                                                                                                                                                                | Structure                                                                             |
|-----|----------------|-------------------------------------------|-------------|------------|--------------------------------------------------------------------------------------------------------------------------------------------------------------------------------------------------------------------|---------------------------------------------------------------------------------------|
| 1   | Morphine       | 286                                       | 1.01        | 25         | 286 (100), 229 (11.01), 211 (11.97), 209 (8.65), 201 (27.03), 193 (6.91), 185 (13.14), 183 (11.34), 180.9 (8.42), 173 (12.69), 165 (12.95), 157 (5.02), 155 (11.35), 147 (6.32), 145 (5.78), 58 (11.42), 44 (6.78) | 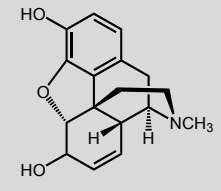   |
| 2   | Oripavine      | 296                                       | 3.5         | 25         | 298 (2), 283 (1), 267 (1), 249 (3), 237 (1), 234 (4), 223 (1), 221 (1), 218 (8), 196 (5), 58 (100)                                                                                                                 |    |
| 3   | Codeine        | 300                                       | 3.52        | 25         | 300 (100), 282 (5.51), 243 (9.69), 241 (5.95), 225 (16.09), 215 (26.76), 209 (5.54), 199 (16.42), 193 (7.43), 187 (10.45), 183 (15.64), 181 (7.1), 165 (11.75), 161 (8.53), 155 (7.47), 58 (16.33), 44 (6.68)      |    |
| 4   | Thebaine       | 312                                       | 5.43        | 25         | 312 (2), 281 (2), 266 (4), 255 (1), 251 (11), 249 (2), 237 (1), 234 (2), 223 (2), 221 (7), 218 (4), 195 (2), 177 (1), 58 (100)                                                                                     |   |
| 5   | (S)-Stylopine  | 324                                       | 11.25       | 25         | 324 (20.4), 176 (100), 149 (39.94), 119 (6.39)                                                                                                                                                                     |  |
| 6   | (R,S)-Boldine  | 328                                       | 4.98        | 25         | 297 (14.39), 282 (16.54), 267 (6.43), 266 (9.19), 265 (90.58), 237 (100), 233 (14.66), 222 (8.36), 205 (32.45), 177 (8.96), 44 (8.79)                                                                              |  |
| 7   | (S)-Scoulerine | 328                                       | 6.21        | 25         | 328 (9.02), 178 (100), 151 (10.77)                                                                                                                                                                                 |  |
| 8   | (S)-Reticuline | 330                                       | 4.76        | 25         | 192 (100), 177 (8.09), 175 (19.32), 151 (5.45), 143 (25), 137 (41.49)                                                                                                                                              |  |

|    |                            |     |       |    |                                                                                                                                                                                             |                                                                                       |
|----|----------------------------|-----|-------|----|---------------------------------------------------------------------------------------------------------------------------------------------------------------------------------------------|---------------------------------------------------------------------------------------|
| 9  | Sanguinarine               | 332 | 8.26  | 25 | 332 (100), 330 (6.14), 317 (15.91), 304 (22.86), 302 (7.52), 274 (14.07)                                                                                                                    | 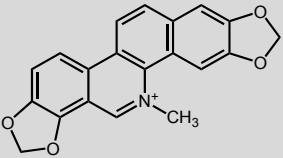   |
| 10 | Berberine                  | 336 | 8.02  | 25 | 336 (45.63), 321 (56.34), 320 (100), 306 (22.08), 304 (16.43), 292 (83.38), 278 (5.47), 275 (5.7)                                                                                           |    |
| 11 | (R,S)-Canadine             | 340 | 10.28 | 25 | 340 (9.82), 176 (100), 149 (9.5)                                                                                                                                                            |    |
| 12 | Papaverine                 | 340 | 8.47  | 25 | 340 (70.91), 325 (7.91), 324 (74.12), 296 (11.54), 202 (100), 171 (15.27)                                                                                                                   |    |
| 13 | (S)-Isocorydine            | 342 | 6.97  | 25 | 311 (13.26), 296 (36.67), 281 (30.93), 280 (34.69), 279 (100), 267 (5.76), 265 (39.91), 264 (84.05), 251 (24.03), 248 (64.06), 247 (18.41), 236 (40.49), 235 (5.61), 219 (9.84), 191 (8.47) |  |
| 14 | (R,S)-Tetrahydropapaverine | 344 | 6.23  | 25 | 296 (6.8), 192 (100), 189 (33.2), 174 (16.15), 158 (11.77), 151 (51.84)                                                                                                                     |  |
| 15 | Chelerythrine              | 348 | 8.24  | 25 | 348 (45.51), 333 (37.27), 332 (100), 318 (31.94), 316 (8.2), 315 (8.48), 304 (56), 290 (8.73)                                                                                               |  |
| 16 | Protopine                  | 354 | 6.81  | 25 | 354 (59.25), 336 (9.18), 271 (16.84), 265 (6.09), 247 (9.8), 206 (17.05), 189 (79.71), 188 (100), 177 (6.22), 175 (5.93), 165 (14.85), 149 (46.29), 135 (6.12)                              |  |

|    |                           |     |       |    |                                                                                                                                                                                                                                                                                  |                                                                                       |
|----|---------------------------|-----|-------|----|----------------------------------------------------------------------------------------------------------------------------------------------------------------------------------------------------------------------------------------------------------------------------------|---------------------------------------------------------------------------------------|
| 17 | (S)-Glaucine              | 356 | 7.64  | 25 | 325 (8.04), 310 (37.78), 295 (30.25), 294 (100), 279 (27.57)                                                                                                                                                                                                                     | 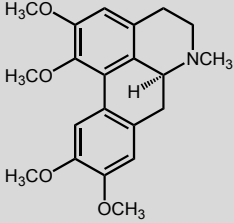   |
| 18 | (R,S)-Tetrahydropalmatine | 356 | 9.58  | 25 | 356 (10.45), 192 (100), 165 (22.38), 150 (5.5)                                                                                                                                                                                                                                   |    |
| 19 | Allocryptopine            | 370 | 6.99  | 25 | 370 (36.41), 352 (18.72), 337 (5.03), 336 (7.29), 321 (5.84), 306 (7.59), 290 (31.63), 206 (27.8), 191 (6.21), 190 (8.31), 189 (34.38), 188 (100), 181 (18.47), 166 (6.37), 165 (13.62), 151 (9.34), 149 (9.71)                                                                  |    |
| 20 | (S)-Canadaline            | 370 | 6.85  | 25 | 290 (12.64), 190 (100)                                                                                                                                                                                                                                                           |   |
| 21 | Cryptopine                | 370 | 6.65  | 25 | 370 (68.18), 352 (10.46), 339 (5.46), 321 (9.4), 311 (6.87), 291 (15.92), 290 (5.28), 283 (5.57), 263 (10.91), 222 (16.66), 206 (8.09), 205 (69.54), 204 (100), 194 (8.21), 193 (11.48), 190 (32.49), 175 (10.43), 165 (89.48), 151 (5.35), 150 (12.28), 149 (23.01), 135 (5.56) |  |
| 22 | Hydrastine                | 384 | 7.68  | 25 | 369 (7.93), 366 (10.08), 354 (17.54), 351 (65.15), 336 (100), 333 (5.55), 308 (6)                                                                                                                                                                                                |  |
| 23 | Noscapine                 | 414 | 10.67 | 25 | 414 (5), 365 (18.39), 323 (5.23), 220 (100), 206 (5), 179 (6.43)                                                                                                                                                                                                                 |  |
